# Supplementary material for: Terminal and Internal Alkyne Complexes and Azide-Alkyne Cycloaddition Chemistry of Copper(I) Supported by a Fluorinated Bis(pyrazolyl)borate
Source: MDPI journal article supplement (doi:10.3390/molecules27010016), 2021-12-21
Supplement: s1 [file s1]

# Terminal and internal alkyne complexes and azide-alkyne cycloaddition chemistry of copper(I) supported by a fluorinated bis(pyrazolyl)borate

Anurag Noonikara-Poyil,<sup>[1]</sup> Alvaro Muñoz-Castro,<sup>[2]</sup> and H. V. Rasika Dias<sup>[1]</sup>

## Affiliations:

[1] Department of Chemistry and Biochemistry, The University of Texas at Arlington, Arlington, Texas 76019, United States, Email: [dias@uta.edu](mailto:dias@uta.edu)

[2] Grupo de Química Inorgánica y Materiales Moleculares, Facultad de Ingeniería, Universidad Autónoma de Chile, El Llano Subercaseaux 2801, Santiago, Chile, Email: [alvaro.munoz@uautonoma.cl](mailto:alvaro.munoz@uautonoma.cl)

## Table of Contents

|                                                                                                        |      |
|--------------------------------------------------------------------------------------------------------|------|
| Selected bond distances, angles, and C≡C stretching frequency .....                                    | S-2  |
| Spectroscopic data comparison of metal complexes .....                                                 | S-3  |
| <sup>1</sup> H, <sup>13</sup> C, <sup>19</sup> F NMR Spectra and Raman spectra of Metal complexes..... | S-4  |
| Characterization of Triazoles.....                                                                     | S-9  |
| <sup>1</sup> H and <sup>13</sup> C NMR Spectra of Triazoles.....                                       | S-11 |
| X-ray data and structure determinations.....                                                           | S-17 |
| Raman spectra of free Alkyne .....                                                                     | S-29 |
| Computational details .....                                                                            | S-31 |
| References.....                                                                                        | S-33 |

**Table S1.** Selected bond distances (Å) and angles (°) and C≡C stretching frequency for mononuclear [H<sub>2</sub>B(3,5-(CF<sub>3</sub>)<sub>2</sub>Pz)<sub>2</sub>]Cu(HC≡CH) (**4**), [H<sub>2</sub>B(3,5-(CF<sub>3</sub>)<sub>2</sub>Pz)<sub>2</sub>]Cu(EtC≡CEt) (**6**), and [H<sub>2</sub>B(3,5-(CF<sub>3</sub>)<sub>2</sub>Pz)<sub>2</sub>]Cu(PhC≡CH) (**8**) (top-row of figures below from L to R), and dinuclear Cu<sub>2</sub>(μ-[4-Br-3,5-(CF<sub>3</sub>)<sub>2</sub>Pz])<sub>2</sub>(HC≡CH)<sub>2</sub> (**2**), Cu<sub>2</sub>(μ-[3,5-(CF<sub>3</sub>)<sub>2</sub>Pz])<sub>2</sub>(EtC≡CEt)<sub>2</sub> (**7**), and Cu<sub>2</sub>(μ-[3,5-(CF<sub>3</sub>)<sub>2</sub>Pz])<sub>2</sub>(HC≡CPh)<sub>2</sub> (**9**) (bottom-row of figures below from L to R).

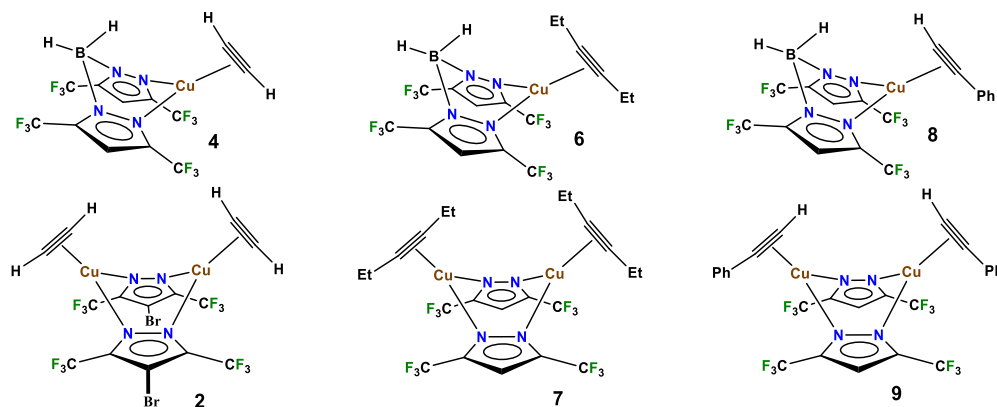

| Parameter\ Complex                    | [H <sub>2</sub> B(3,5-(CF <sub>3</sub> ) <sub>2</sub> Pz) <sub>2</sub> ]Cu(HC≡CH) ( <b>4</b> ) | Cu <sub>2</sub> (μ-[4-Br-3,5-(CF <sub>3</sub> ) <sub>2</sub> Pz]) <sub>2</sub> (HC≡CH) <sub>2</sub> ( <b>2</b> )* | [H <sub>2</sub> B(3,5-(CF <sub>3</sub> ) <sub>2</sub> Pz) <sub>2</sub> ]Cu(EtC≡CEt) ( <b>6</b> ) | Cu <sub>2</sub> (μ-[3,5-(CF <sub>3</sub> ) <sub>2</sub> Pz]) <sub>2</sub> (EtC≡CEt) <sub>2</sub> ( <b>7</b> ) | [H <sub>2</sub> B(3,5-(CF <sub>3</sub> ) <sub>2</sub> Pz) <sub>2</sub> ]Cu(HC≡CPh) ( <b>8</b> ) | Cu <sub>2</sub> (μ-[3,5-(CF <sub>3</sub> ) <sub>2</sub> Pz]) <sub>2</sub> (HC≡CPh) <sub>2</sub> ( <b>9</b> )** |
|---------------------------------------|------------------------------------------------------------------------------------------------|-------------------------------------------------------------------------------------------------------------------|--------------------------------------------------------------------------------------------------|---------------------------------------------------------------------------------------------------------------|-------------------------------------------------------------------------------------------------|----------------------------------------------------------------------------------------------------------------|
| Cu-C                                  | 1.972(3)<br>1.973(3)                                                                           | 1.966(3)<br>1.974(3)                                                                                              | 1.9818(16)<br>1.9862(16)                                                                         | 1.9844(13)<br>1.9766(17)<br>1.9741(18)<br>1.9758(16)                                                          | 1.936(4)<br>2.003(4)                                                                            | 1.944(3)<br>1.987(3)<br>1.944(3)<br>2.014(3)                                                                   |
| C≡C                                   | 1.225(5)                                                                                       | 1.227(4)                                                                                                          | 1.235(2)                                                                                         | 1.225(3)<br>1.228(3)                                                                                          | 1.205(6)                                                                                        | 1.228(4)<br>1.225(4)                                                                                           |
| Cu-N                                  | 1.981(3)<br>1.981(3)                                                                           | 1.9697(18)<br>1.9742(18)                                                                                          | 1.9992(14)<br>2.0022(14)                                                                         | 1.9750(14)<br>1.9921(14)<br>1.9873(14)<br>1.9850(14)                                                          | 1.989(3)<br>1.991(3)                                                                            | 1.976(2)<br>1.962(2)<br>1.986(2)<br>1.967(2)<br>1.969(2)<br>1.984(2)<br>1.958(2)<br>1.968(2)                   |
| C-Cu-C                                | 36.17(14)                                                                                      | 36.29(11)                                                                                                         | 36.26(7)                                                                                         | 36.03(8)<br>36.22(7)                                                                                          | 35.56(18)                                                                                       | 36.38(12)<br>36.01(13)<br>35.91(12)<br>36.66(12)                                                               |
| N-Cu-N                                | 96.63(10)                                                                                      | 98.94(8)                                                                                                          | 91.94(6)                                                                                         | 96.62(6)<br>98.35(6)                                                                                          | 94.16(11)                                                                                       | 99.77(9)<br>100.57(9)<br>100.98(9)<br>98.88(9)                                                                 |
| C≡C-C                                 | -                                                                                              | -                                                                                                                 | 160.33(17)<br>162.90(17)                                                                         | 161.72(18)<br>161.5(2)<br>160.30(18)<br>161.19(19)                                                            | 163.5(4)                                                                                        | 160.7(3)<br>162.2(3)<br>162.4(3)<br>160.0(3)                                                                   |
| $\tilde{\nu}(\text{C}\equiv\text{C})$ | 1819                                                                                           | 1811                                                                                                              | 2064                                                                                             | 2033, 2066                                                                                                    | 1927                                                                                            | 1918, 1928, 1950                                                                                               |
| ref                                   | <i>This work</i>                                                                               | [1]                                                                                                               | This work and [2]                                                                                | [3]                                                                                                           | [4]                                                                                             | [1]                                                                                                            |

\*Cu<sub>2</sub>(μ-[4-Br-3,5-(CF<sub>3</sub>)<sub>2</sub>Pz])<sub>2</sub>(HC≡CH)<sub>2</sub> sites on a plane of symmetry

\*\*There are two molecules of Cu<sub>2</sub>(μ-[3,5-(CF<sub>3</sub>)<sub>2</sub>Pz])<sub>2</sub>(HC≡CPh)<sub>2</sub> in the asymmetric unit

**Table S2:** Selected NMR spectroscopic (RC≡CR) and C≡C stretching frequency data.

| Compound                                                                                                             | Raman/IR<br>(cm <sup>-1</sup> ) | <sup>1</sup> H NMR (ppm,<br>in CDCl <sub>3</sub> ) (≡CH peak) | <sup>13</sup> C{ <sup>1</sup> H} NMR<br>(ppm, in CDCl <sub>3</sub> )<br>(C≡C peaks) | Reference             |
|----------------------------------------------------------------------------------------------------------------------|---------------------------------|---------------------------------------------------------------|-------------------------------------------------------------------------------------|-----------------------|
| [H <sub>2</sub> B(3,5-(CF <sub>3</sub> ) <sub>2</sub> Pz) <sub>2</sub> ] <sub>2</sub> Cu(HC≡CH) (4)                  | 1819                            | 4.70                                                          | 80.2                                                                                | This paper            |
| Free Acetylene                                                                                                       | 1974                            | 1.90                                                          | 73.2                                                                                | [5]                   |
| Cu <sub>2</sub> (μ-[4-Br-3,5-(CF <sub>3</sub> ) <sub>2</sub> Pz]) <sub>2</sub> (HC≡CH) <sub>2</sub> (2)              | 1811                            | 4.75 (- 70 °C)                                                | -                                                                                   | [1]                   |
| [Cu-(NH(py)) <sub>2</sub> (C <sub>2</sub> H <sub>2</sub> )]BF <sub>4</sub>                                           | 1795                            | 5.21/5.59*                                                    | -                                                                                   | [6,7]                 |
| [Cu(phen)(HC≡CH)]ClO <sub>4</sub>                                                                                    | 1800                            | -                                                             | -                                                                                   | [8]                   |
| Cu <sub>4</sub> (μ-[3,5-(CF <sub>3</sub> ) <sub>2</sub> Pz]) <sub>4</sub> (μ-HC≡CH) <sub>2</sub> (3)                 | 1638                            | 6.16                                                          | 79.2                                                                                | [1]                   |
| [H <sub>2</sub> B(3,5-(CF <sub>3</sub> ) <sub>2</sub> Pz) <sub>2</sub> ] <sub>2</sub> Cu(HC≡CSiMe <sub>3</sub> ) (5) | 1870                            | 4.81                                                          | 97.2, 97.8                                                                          | This paper            |
| Trimethylsilylacetylene                                                                                              | 2107                            | 2.36                                                          | 90.2, 93.1                                                                          | -                     |
| [H <sub>2</sub> B(3,5-(CF <sub>3</sub> ) <sub>2</sub> Pz) <sub>2</sub> ] <sub>2</sub> Cu(PhC≡CH) (8)                 | 1927                            | 4.60                                                          | 79.2, 95.4 <sup>#</sup>                                                             | [4]                   |
| Phenylacetylene                                                                                                      | 2111                            | 3.21                                                          | 78.8, 84.2                                                                          | -                     |
| Cu <sub>2</sub> (μ-[3,5-(CF <sub>3</sub> ) <sub>2</sub> Pz]) <sub>2</sub> (HC≡CPh) <sub>2</sub> (9)                  | 1918, 1928,<br>1950             | 3.17                                                          | 77.8, 84.5                                                                          | [1]                   |
| [H <sub>2</sub> B(3,5-(CF <sub>3</sub> ) <sub>2</sub> Pz) <sub>2</sub> ] <sub>2</sub> Cu(EtC≡CEt) (6)                | 2064                            | -                                                             | 91.0                                                                                | This paper and<br>[2] |
| 3-Hexyne                                                                                                             | 2231, 2247,<br>2298             | -                                                             | 81.0                                                                                | -                     |
| Cu <sub>2</sub> (μ-[3,5-(CF <sub>3</sub> ) <sub>2</sub> Pz]) <sub>2</sub> (EtC≡CEt) <sub>2</sub> (7)                 | 2033, 2066                      | -                                                             | 82.5                                                                                | [3]                   |

\*NMR spectrum in (CD<sub>3</sub>)<sub>2</sub>CO, <sup>#</sup>NMR spectrum in C<sub>6</sub>D<sub>6</sub>

# $^1\text{H}$ , $^{13}\text{C}$ , and $^{19}\text{F}$ NMR Spectra of Metal Complexes

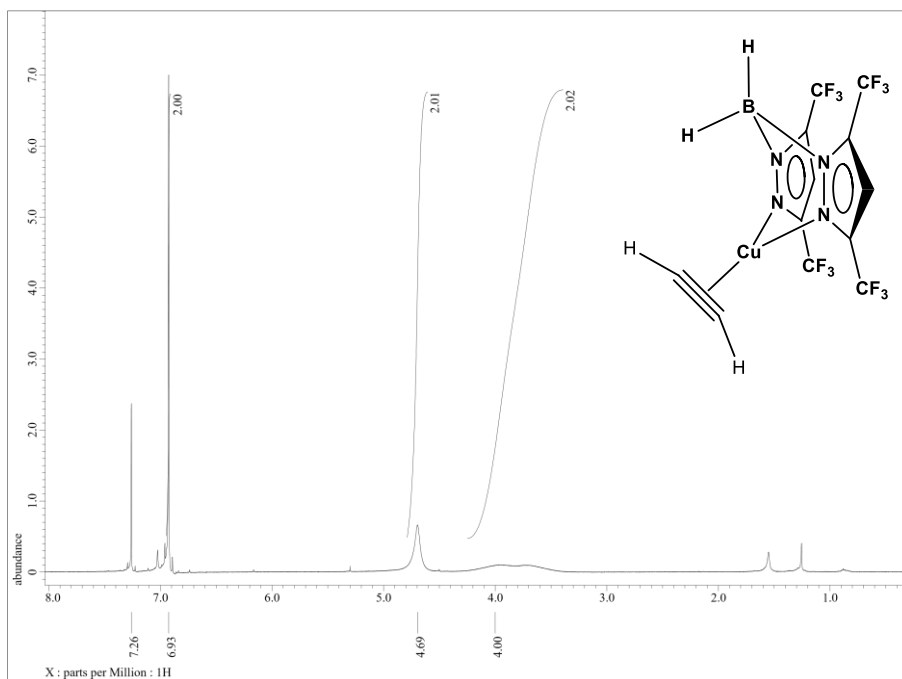

**Figure S1:**  $^1\text{H}$  NMR spectrum of  $[\text{H}_2\text{B}(3,5\text{-(CF}_3)_2\text{Pz)}_2]\text{Cu}(\text{HC}\equiv\text{CH})$  (4) in  $\text{CDCl}_3$ .

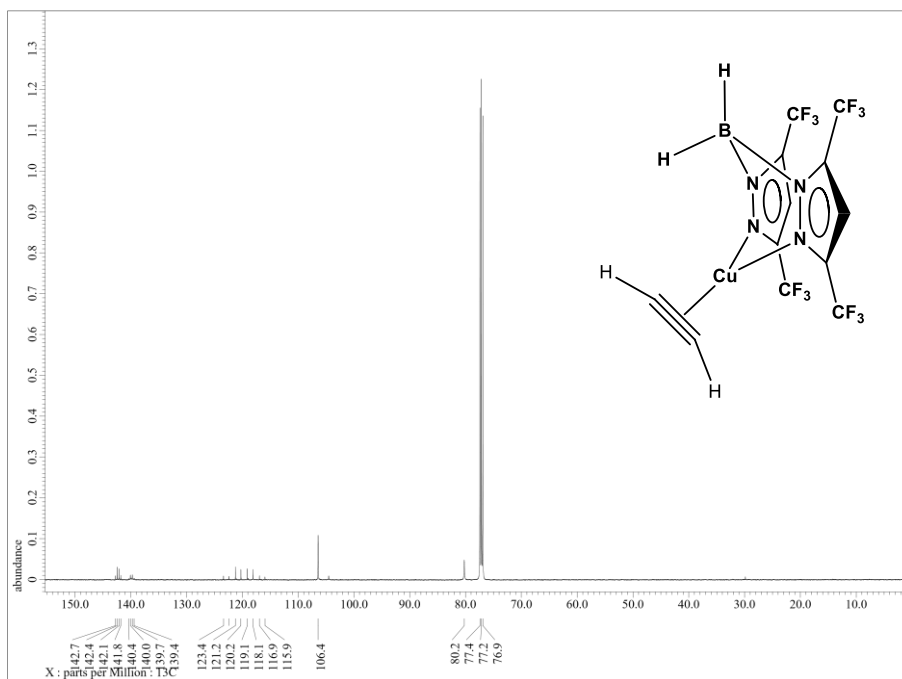

**Figure S2:**  $^{13}\text{C}\{^1\text{H}\}$  NMR spectrum of  $[\text{H}_2\text{B}(3,5\text{-(CF}_3)_2\text{Pz)}_2]\text{Cu}(\text{HC}\equiv\text{CH})$  (4) in  $\text{CDCl}_3$ .

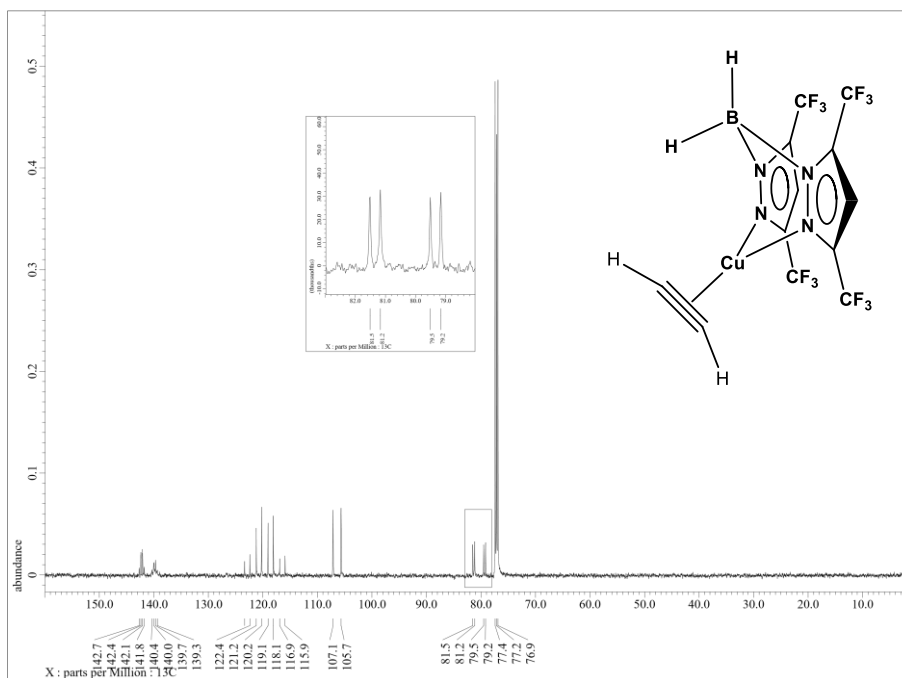

**Figure S3:**  $^{13}\text{C}$  ( $^1\text{H}$  coupled) NMR spectrum of  $[\text{H}_2\text{B}(3,5\text{-(CF}_3)_2\text{Pz)}_2]\text{Cu}(\text{HC}\equiv\text{CH})$  (**4**) in  $\text{CDCl}_3$ .

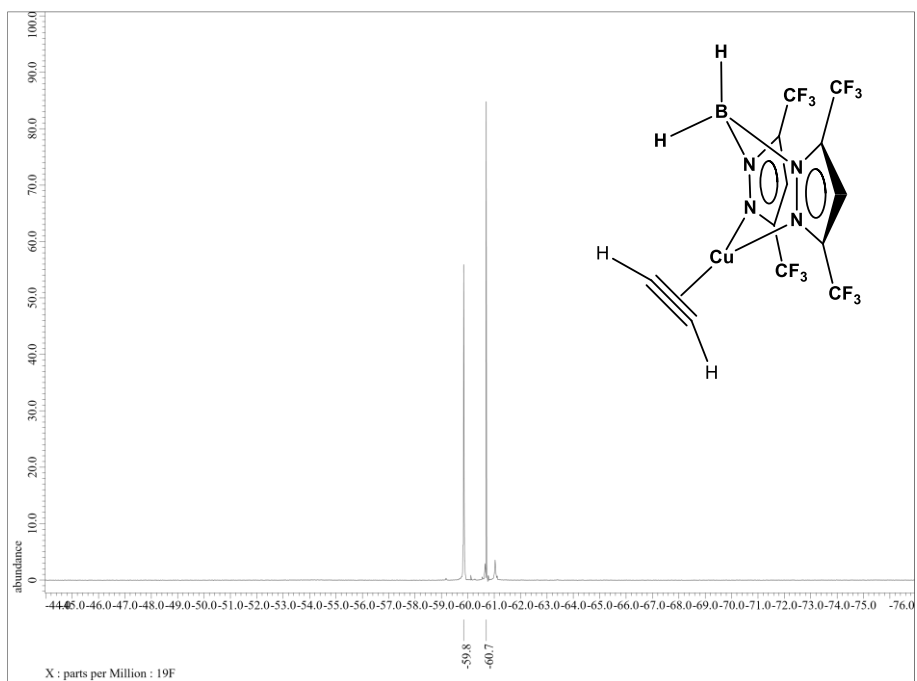

**Figure S4:**  $^{19}\text{F}$  NMR spectrum of  $[\text{H}_2\text{B}(3,5\text{-(CF}_3)_2\text{Pz)}_2]\text{Cu}(\text{HC}\equiv\text{CH})$  (**4**) in  $\text{CDCl}_3$ .

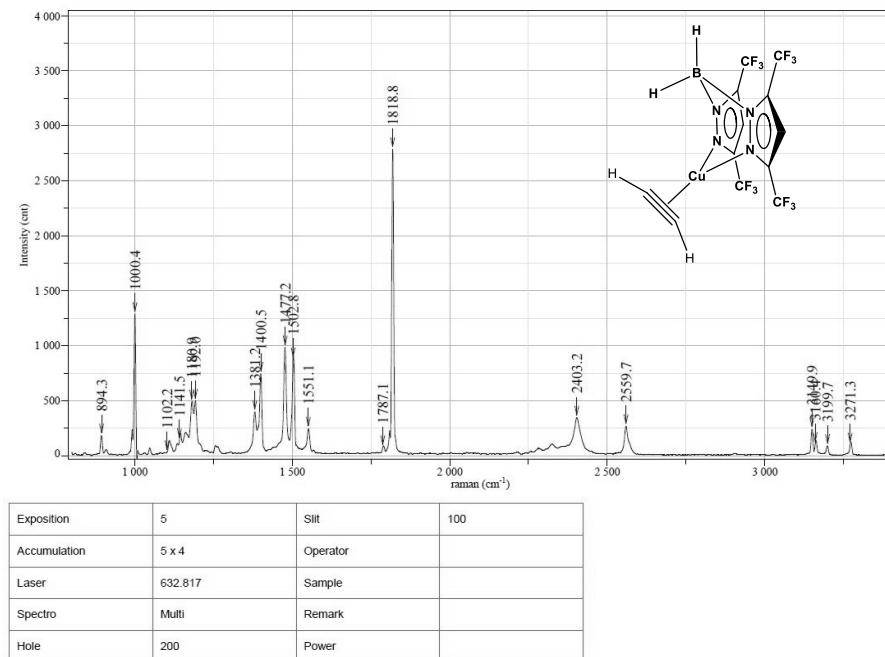

**Figure S5:** Raman spectrum of  $[\text{H}_2\text{B}(3,5\text{-(CF}_3)_2\text{Pz)}_2]\text{Cu}(\text{HC}\equiv\text{CH})$  (**4**).

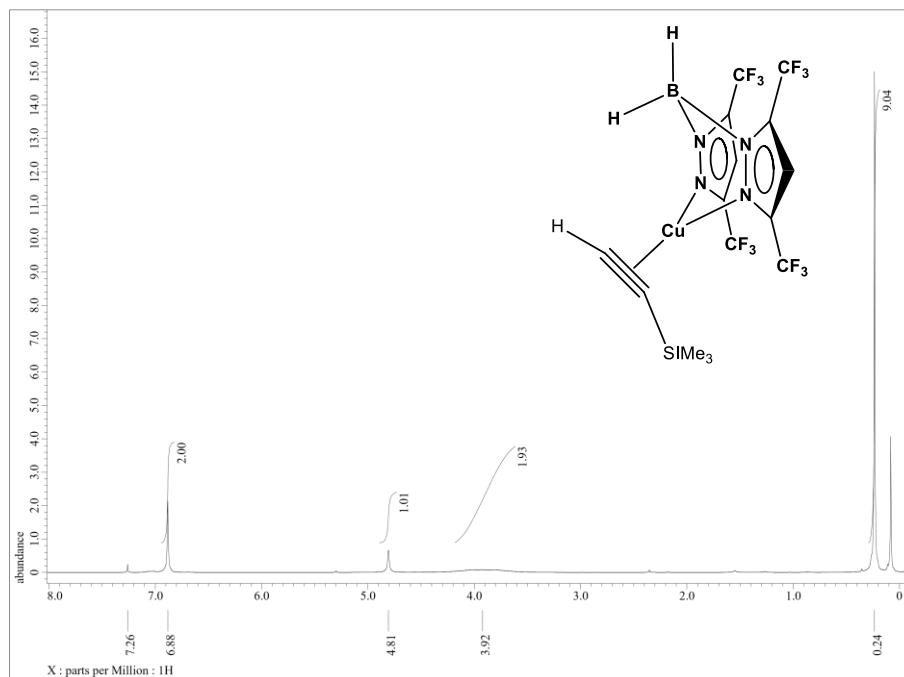

**Figure S6:**  $^1\text{H}$  NMR spectrum of  $[\text{H}_2\text{B}(3,5\text{-(CF}_3)_2\text{Pz)}_2]\text{Cu}(\text{HC}\equiv\text{CSiMe}_3)$  (**5**) in  $\text{CDCl}_3$ .

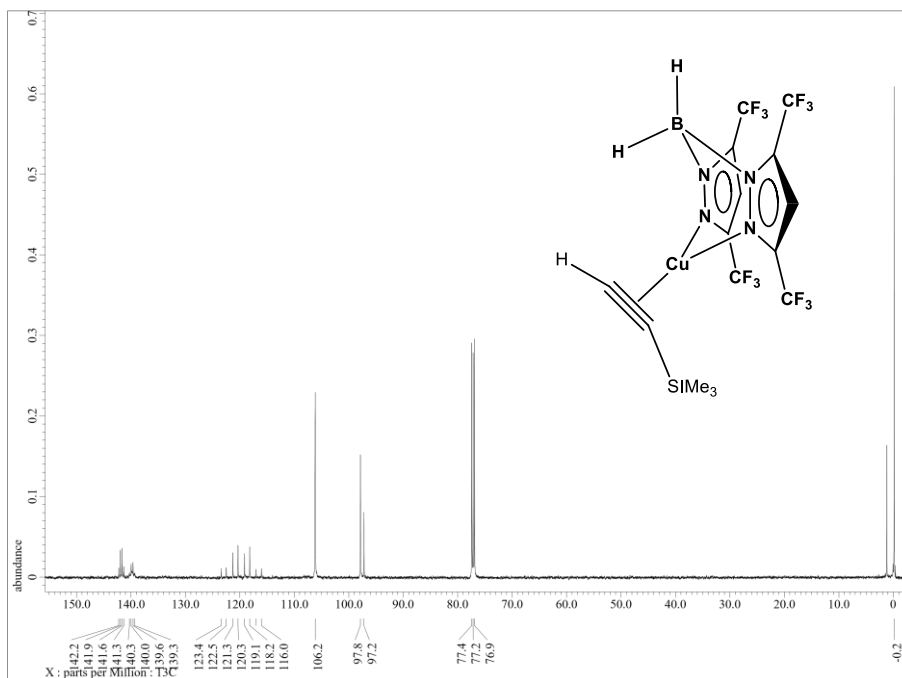

**Figure S7:**  $^{13}\text{C}\{^1\text{H}\}$  NMR spectrum of  $[\text{H}_2\text{B}(3,5\text{-(CF}_3)_2\text{Pz)}_2]\text{Cu}(\text{HC}\equiv\text{CSiMe}_3)$  (**5**) in  $\text{CDCl}_3$ .

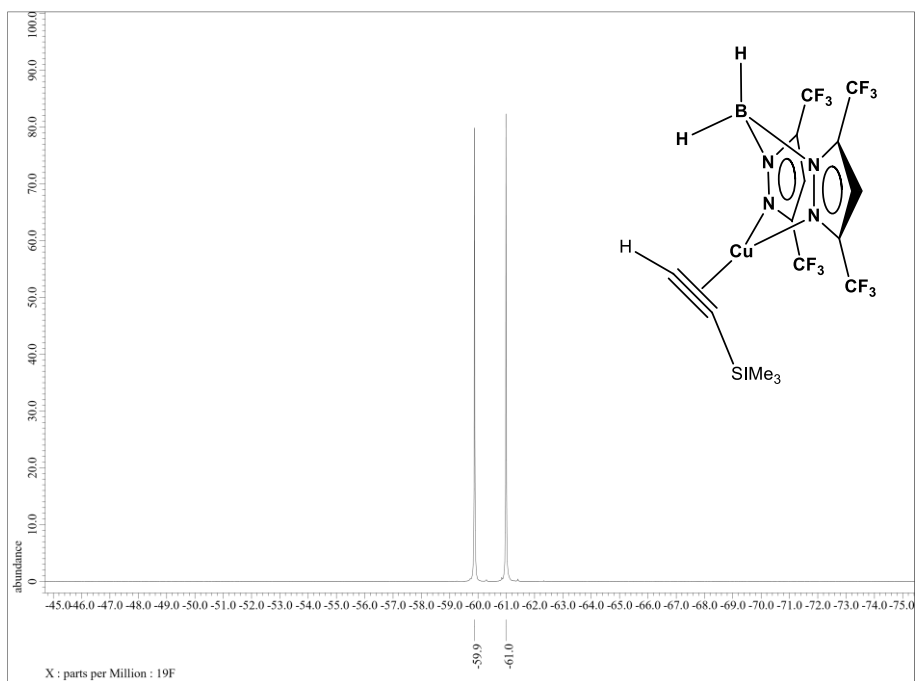

**Figure S8:**  $^{19}\text{F}$  NMR spectrum of  $[\text{H}_2\text{B}(3,5\text{-(CF}_3)_2\text{Pz)}_2]\text{Cu}(\text{HC}\equiv\text{CSiMe}_3)$  (**5**) in  $\text{CDCl}_3$ .

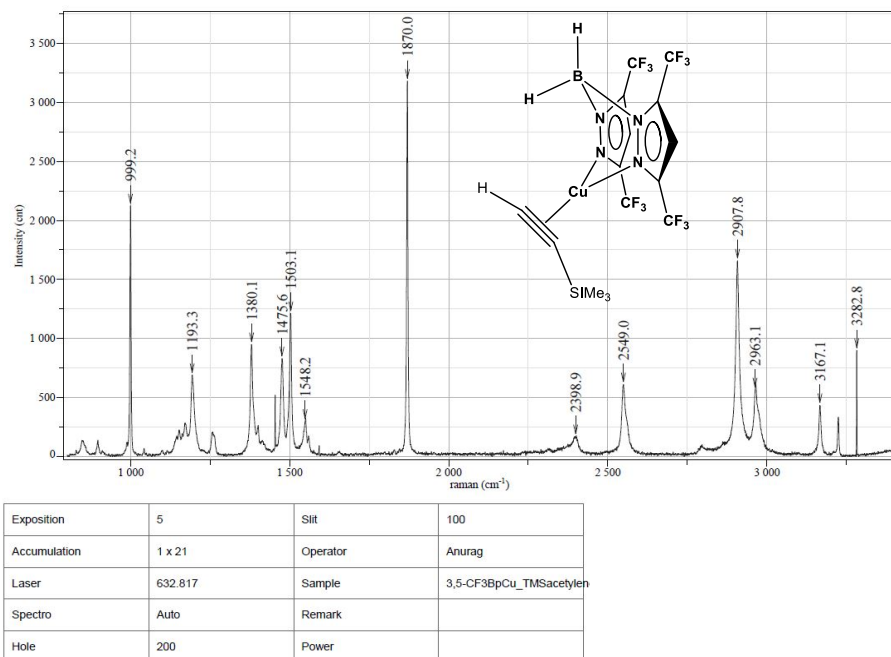

**Figure S9:** Raman spectrum of  $[\text{H}_2\text{B}(3,5\text{-(CF}_3)_2\text{Pz)}_2]\text{Cu}(\text{HC}\equiv\text{CSiMe}_3)$  (**5**).



Cc1ccc(cc1)n2ccncc2CC1=CC=C(C=C1)n2cc(CCC)cnn2Cc1ccc(cc1)n2cc(CCCC)cnn2CC1=CC=C(C=C1)n2cc(CCCCCCCC)cnn2

S9

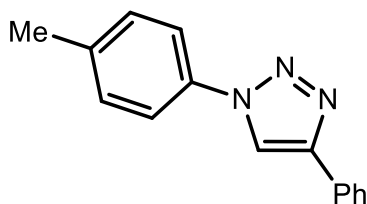

**4-phenyl-1-(*p*-tolyl)-1*H*-1,2,3-triazole**[9]: From Phenylacetylene and *p*-tolyl azide as described in the general method (see above).  $^1\text{H}$  NMR (500 MHz,  $\text{CDCl}_3$ ):  $\delta$  8.16 (s, 1H, =CH), 7.92-7.90 (m, 2H, ArH), 7.67-7.65 (m, 2H, ArH), 7.47-7.44 (m, 2H, ArH), 7.38-7.32 (m, 3H, ArH), 2.43 (s, 3H, ArCH<sub>3</sub>).  $^{13}\text{C}\{^1\text{H}\}$  NMR (125 MHz,  $\text{CDCl}_3$ ):  $\delta$  148.4, 139.0, 134.9, 130.5, 130.4, 129.0, 128.5, 125.9, 120.5, 117.7, 21.2.

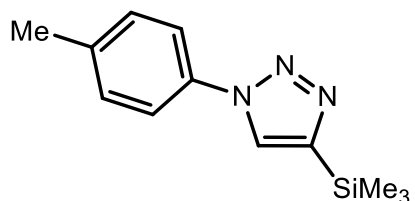

**1-(*p*-tolyl)-4-(trimethylsilyl)-1*H*-1,2,3-triazole**[11]: From Trimethylsilylacetylene and *p*-tolyl azide as described in the general method (see above).  $^1\text{H}$  NMR (500 MHz,  $\text{CDCl}_3$ ):  $\delta$  7.93 (s, 1H, =CH), 7.53 (d,  $J$  = 8.6 Hz, 2H, ArH), 7.19 (d,  $J$  = 8.6 Hz, 2H, ArH), 2.31 (s, 3H, ArCH<sub>3</sub>), 0.31 (s, 9H, Si(CH<sub>3</sub>)<sub>3</sub>).  $^{13}\text{C}\{^1\text{H}\}$  NMR (125 MHz,  $\text{CDCl}_3$ ):  $\delta$  147.0, 138.3, 134.6, 130.0, 127.2, 120.5, 20.9, -1.2.

### $^1\text{H}$ and $^{13}\text{C}$ NMR Spectra of triazoles

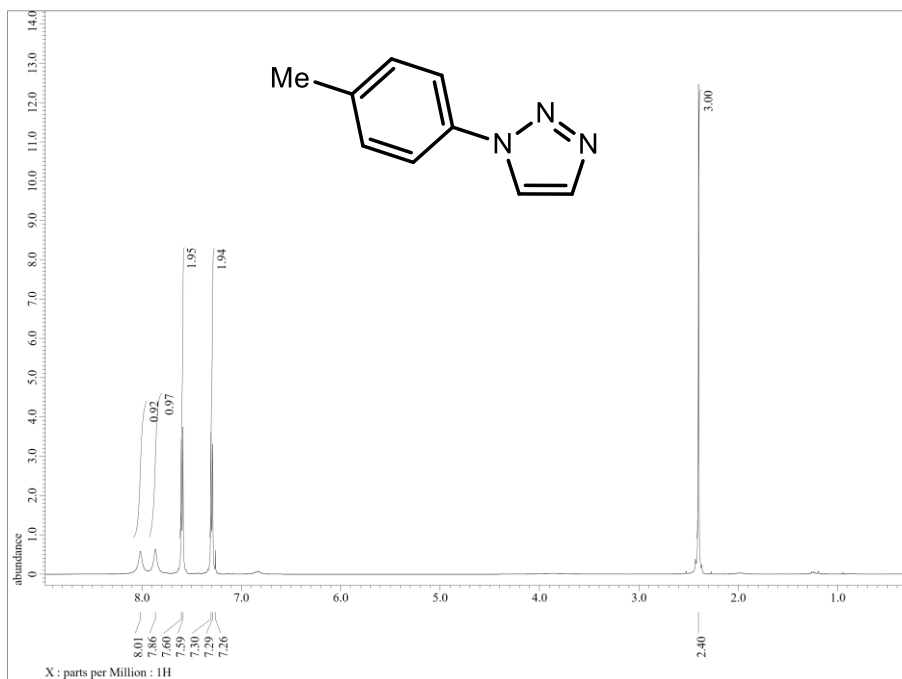

Figure S10:  $^1\text{H}$  NMR spectrum of 1-(*p*-tolyl)-1*H*-1,2,3-triazole in CDCl<sub>3</sub>.

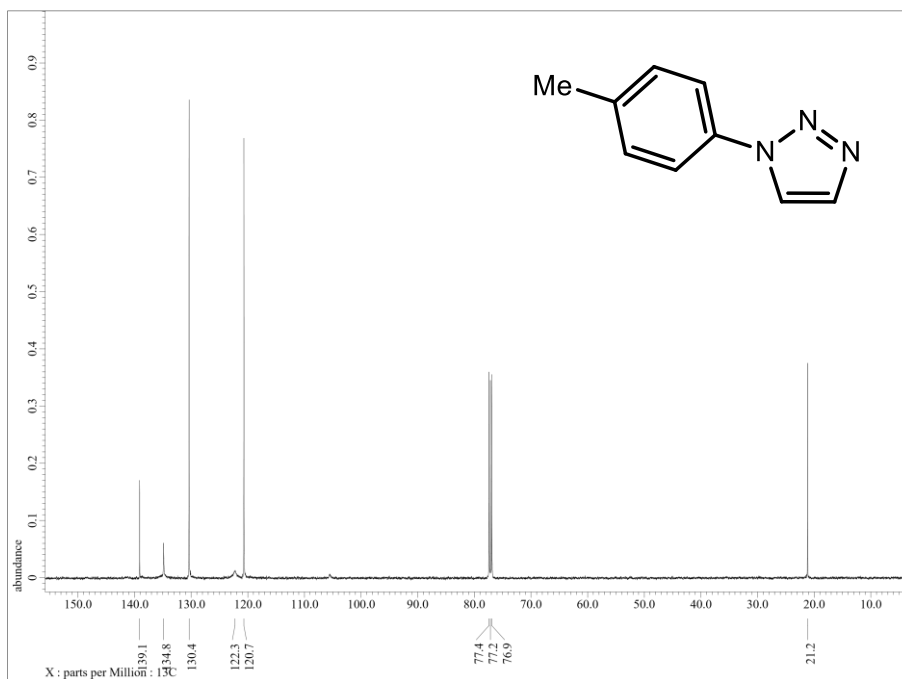

Figure S11:  $^{13}\text{C}\{^1\text{H}\}$  NMR spectrum of 1-(*p*-tolyl)-1*H*-1,2,3-triazole in CDCl<sub>3</sub>.

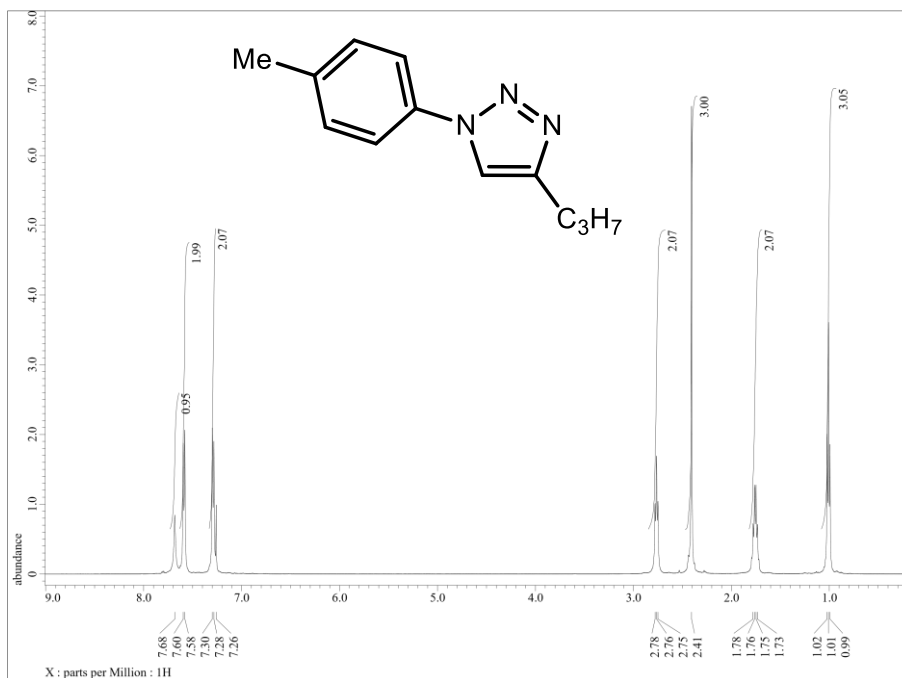

Figure S12: <sup>1</sup>H NMR spectrum of 4-propyl-1-(*p*-tolyl)-1*H*-1,2,3-triazole in CDCl<sub>3</sub>.

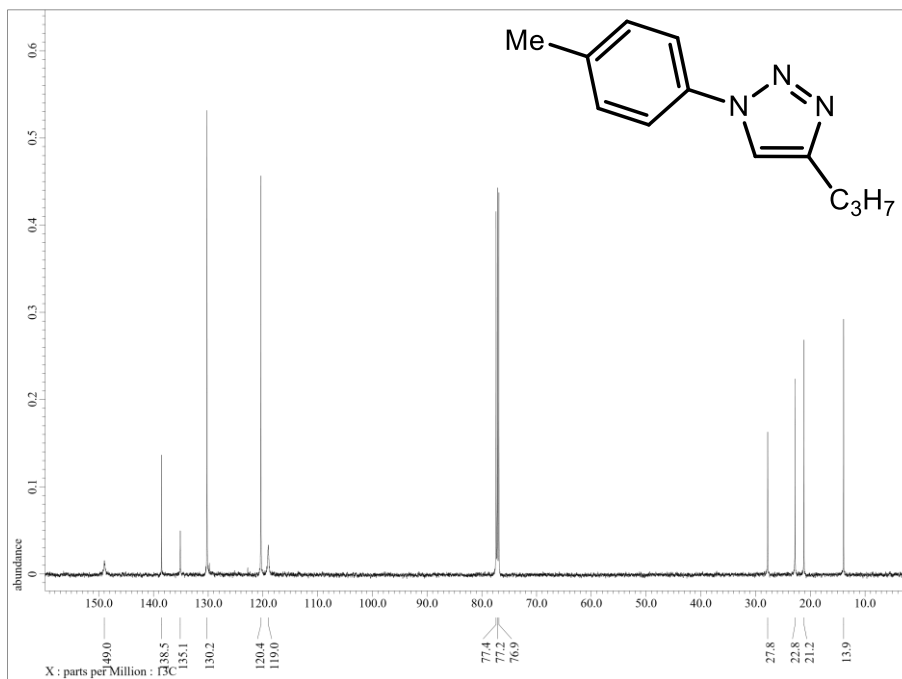

Figure S13: <sup>13</sup>C {<sup>1</sup>H} NMR spectrum of 4-propyl-1-(*p*-tolyl)-1*H*-1,2,3-triazole in CDCl<sub>3</sub>.

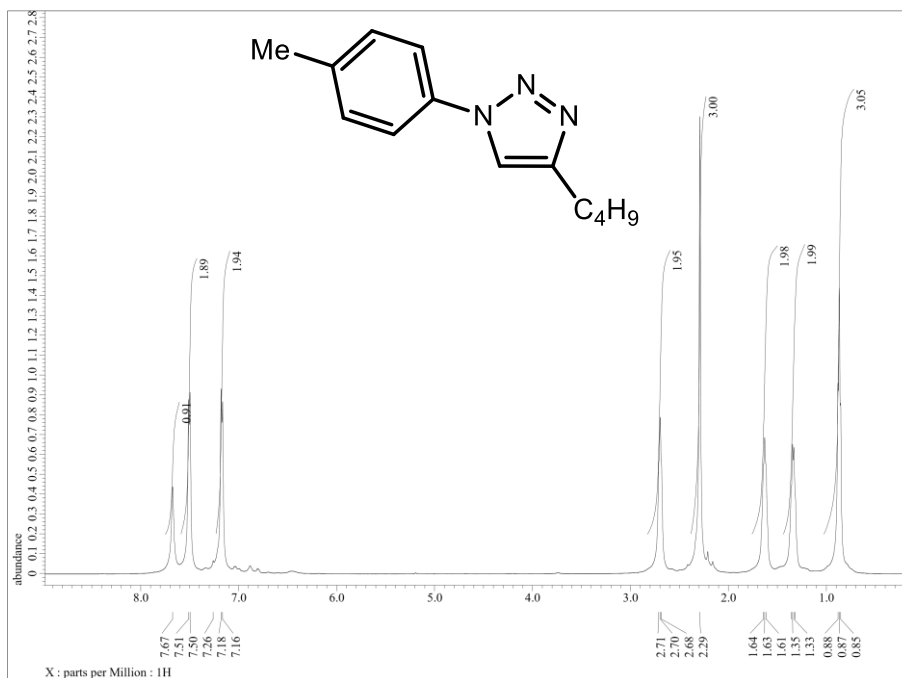

Figure S14: <sup>1</sup>H NMR spectrum of 4-butyl-1-(*p*-tolyl)-1*H*-1,2,3-triazole in CDCl<sub>3</sub>.

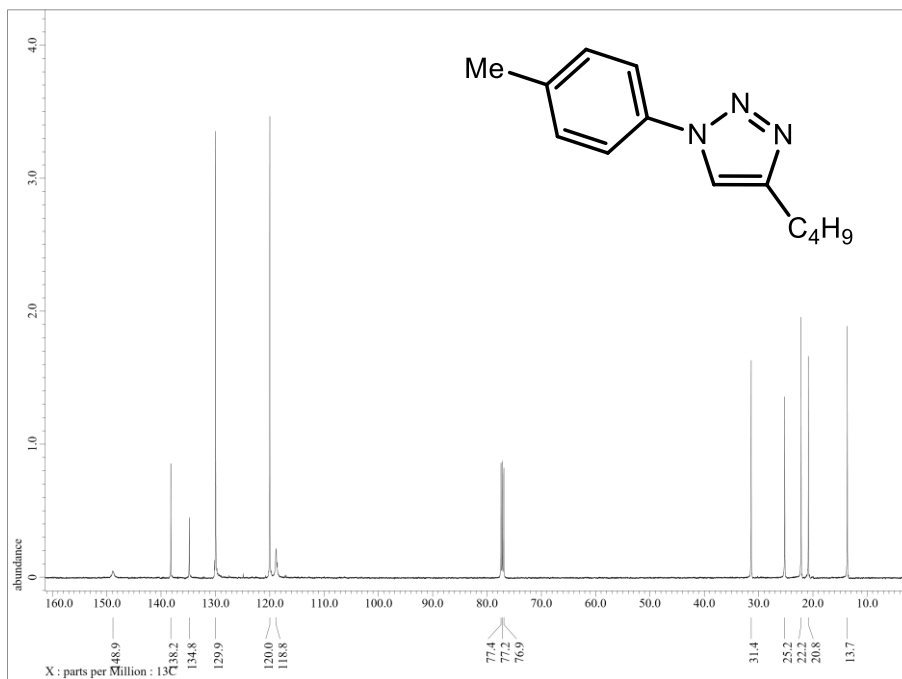

Figure S15: <sup>13</sup>C{<sup>1</sup>H} NMR spectrum of 4-butyl-1-(*p*-tolyl)-1*H*-1,2,3-triazole in CDCl<sub>3</sub>.

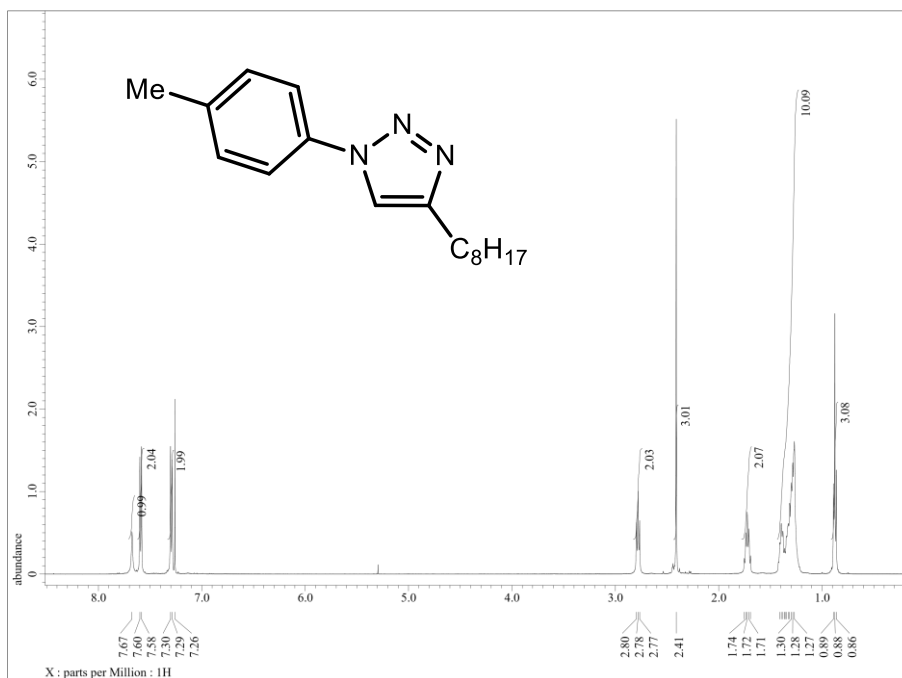

**Figure S16:** <sup>1</sup>H NMR spectrum of 4-octyl-1-(*p*-tolyl)-1*H*-1,2,3-triazole in CDCl<sub>3</sub>.

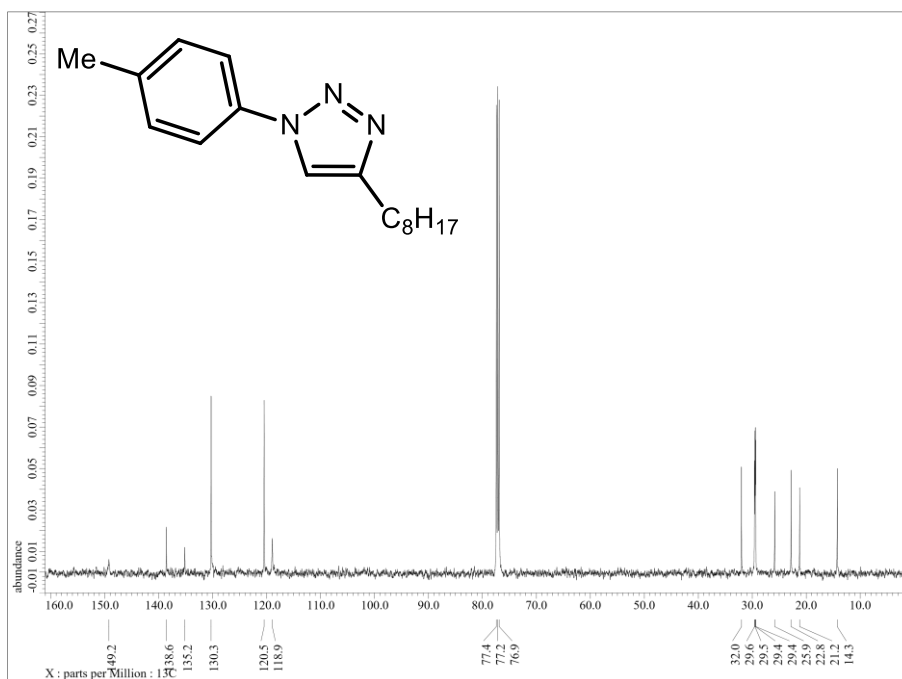

**Figure S17:** <sup>13</sup>C {<sup>1</sup>H} NMR spectrum of 4-octyl-1-(*p*-tolyl)-1*H*-1,2,3-triazole in CDCl<sub>3</sub>.

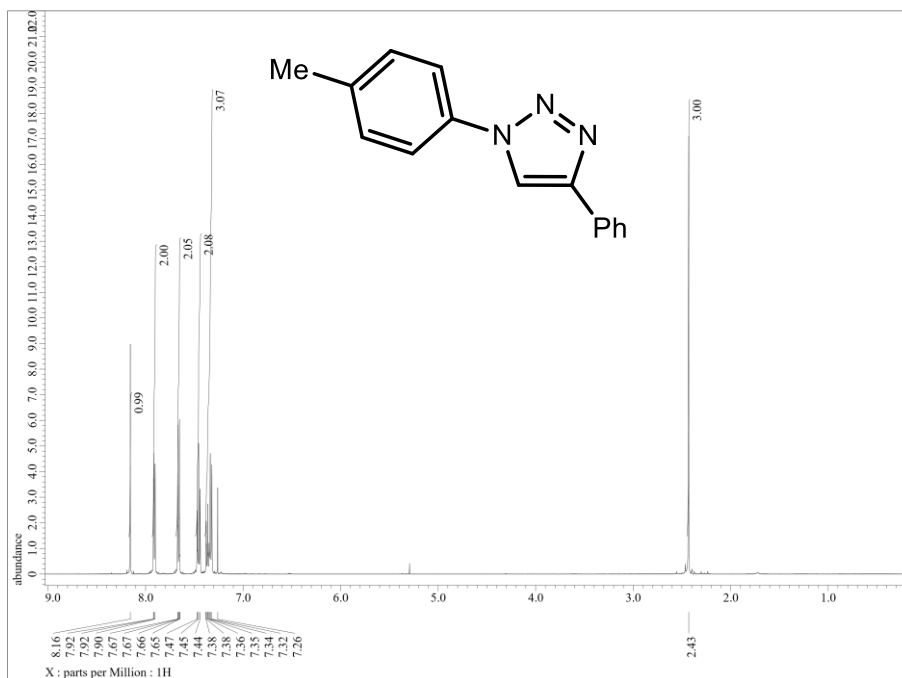

Figure S18: <sup>1</sup>H NMR spectrum of 4-phenyl-1-(*p*-tolyl)-1*H*-1,2,3-triazole in CDCl<sub>3</sub>.

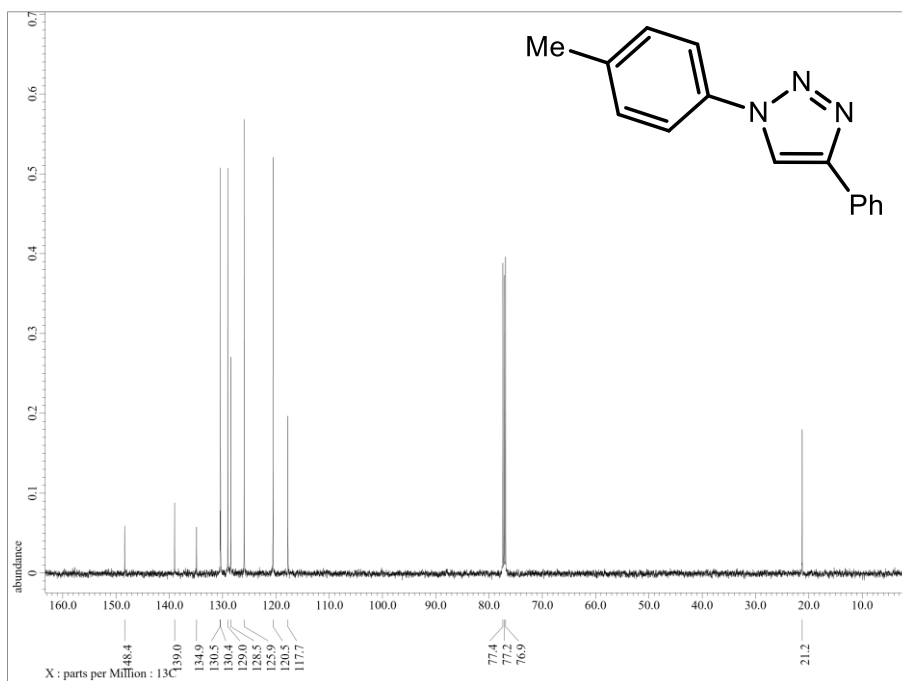

Figure S19: <sup>13</sup>C {<sup>1</sup>H} NMR spectrum of 4-phenyl-1-(*p*-tolyl)-1*H*-1,2,3-triazole in CDCl<sub>3</sub>.

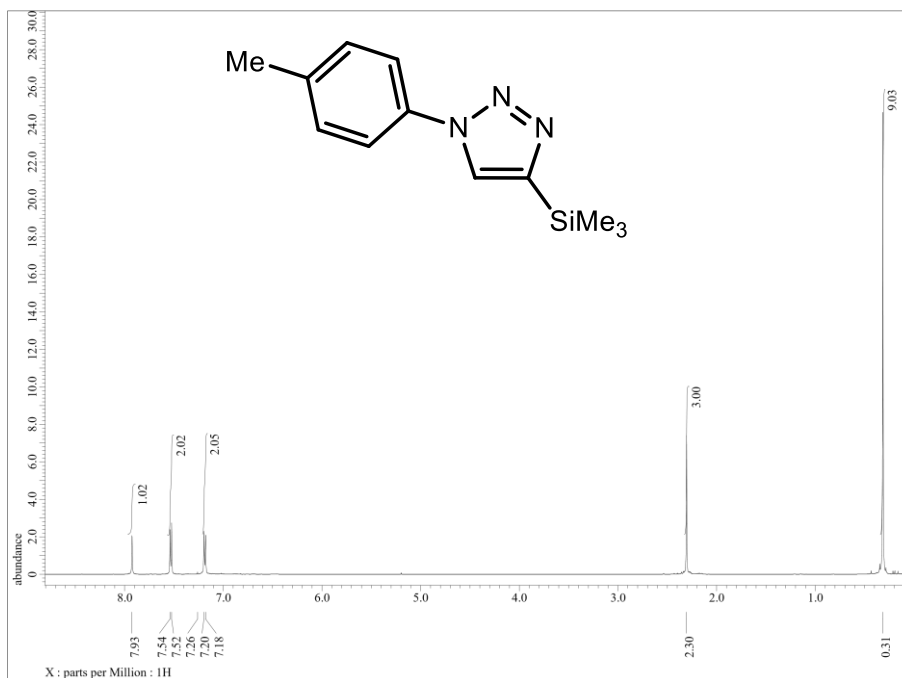

**Figure S20:** <sup>1</sup>H NMR spectrum of 1-(*p*-tolyl)-4-(trimethylsilyl)-1*H*-1,2,3-triazole in CDCl<sub>3</sub>.

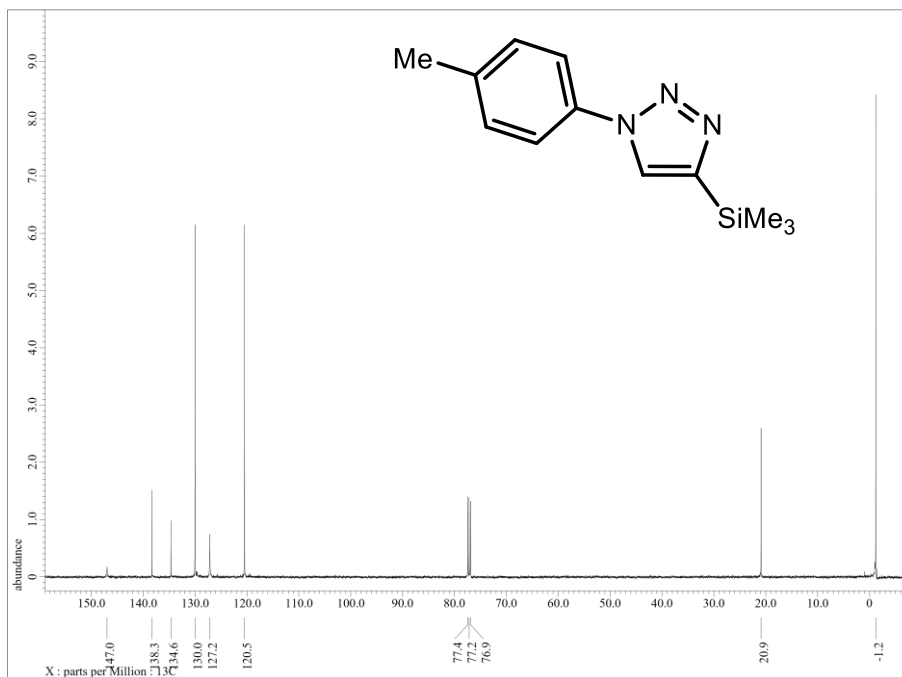

**Figure S21:** <sup>13</sup>C{<sup>1</sup>H} NMR spectrum of 1-(*p*-tolyl)-4-(trimethylsilyl)-1*H*-1,2,3-triazole in CDCl<sub>3</sub>.



### X-ray data and structure determinations

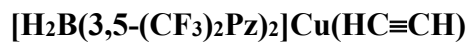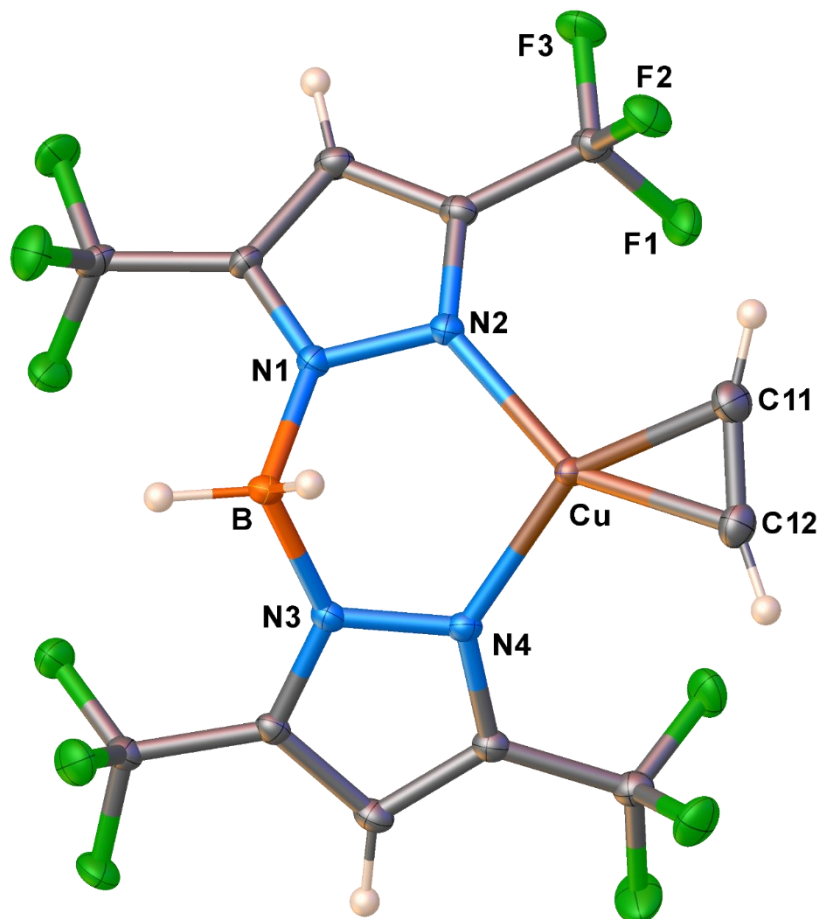

**Figure S22:** Molecular structure of  $[\text{H}_2\text{B}(3,5\text{-(CF}_3)_2\text{Pz})_2]\text{Cu}(\text{HC}\equiv\text{CH})$  (**4**).

**Table S3:** Crystal data and structure refinement for  $[\text{H}_2\text{B}(3,5\text{-(CF}_3)_2\text{Pz})_2]\text{Cu}(\text{HC}\equiv\text{CH})$  (**4**).

|                     |                                                     |
|---------------------|-----------------------------------------------------|
| Identification code | rad685_0m_a                                         |
| Empirical formula   | $\text{C}_{12}\text{H}_6\text{BCuF}_{12}\text{N}_4$ |
| Formula weight      | 508.56                                              |
| Temperature/K       | 99.98                                               |
| Crystal system      | monoclinic                                          |
| Space group         | $\text{P2}_1/\text{n}$                              |
| $a/\text{\AA}$      | 9.2406(5)                                           |
| $b/\text{\AA}$      | 9.3114(5)                                           |

|                                                |                                                               |
|------------------------------------------------|---------------------------------------------------------------|
| c/Å                                            | 19.4623(10)                                                   |
| $\alpha/^\circ$                                | 90                                                            |
| $\beta/^\circ$                                 | 90.690(2)                                                     |
| $\gamma/^\circ$                                | 90                                                            |
| Volume/Å <sup>3</sup>                          | 1674.47(15)                                                   |
| Z                                              | 4                                                             |
| $\rho_{\text{calc}}/\text{cm}^3$               | 2.017                                                         |
| $\mu/\text{mm}^{-1}$                           | 1.439                                                         |
| F(000)                                         | 992.0                                                         |
| Crystal size/mm <sup>3</sup>                   | 0.27 × 0.13 × 0.035                                           |
| Radiation                                      | Mo K $\alpha$ ( $\lambda$ = 0.71073)                          |
| 2 $\theta$ range for data collection/ $^\circ$ | 6.044 to 61.108                                               |
| Index ranges                                   | -13 ≤ h ≤ 13, -13 ≤ k ≤ 13, -27 ≤ l ≤ 27                      |
| Reflections collected                          | 22428                                                         |
| Independent reflections                        | 5110 [R <sub>int</sub> = 0.0358, R <sub>sigma</sub> = 0.0304] |
| Data/restraints/parameters                     | 5110/0/289                                                    |
| Goodness-of-fit on F <sup>2</sup>              | 1.106                                                         |
| Final R indexes [I ≥ 2 $\sigma$ (I)]           | R <sub>1</sub> = 0.0435, wR <sub>2</sub> = 0.1093             |
| Final R indexes [all data]                     | R <sub>1</sub> = 0.0519, wR <sub>2</sub> = 0.1182             |
| Largest diff. peak/hole / e Å <sup>-3</sup>    | 0.76/-0.56                                                    |

**Table S4:** Bond Lengths for [H<sub>2</sub>B(3,5-(CF<sub>3</sub>)<sub>2</sub>Pz)<sub>2</sub>]Cu(HC≡CH) (4).

| Atom | Atom | Length/Å | Atom | Atom | Length/Å |
|------|------|----------|------|------|----------|
| Cu   | N2   | 1.981(3) | N1   | C3   | 1.350(4) |
| Cu   | N4   | 1.981(3) | N1   | B    | 1.570(4) |
| Cu   | C11  | 1.972(3) | N2   | C1   | 1.333(4) |
| Cu   | C12  | 1.973(3) | N3   | N4   | 1.357(4) |
| F1   | C4   | 1.341(4) | N3   | C8   | 1.350(4) |
| F2   | C4   | 1.343(4) | N3   | B    | 1.569(4) |
| F3   | C4   | 1.341(4) | N4   | C6   | 1.336(4) |
| F4   | C5   | 1.334(4) | C1   | C2   | 1.388(4) |
| F5   | C5   | 1.340(4) | C1   | C4   | 1.487(4) |
| F6   | C5   | 1.334(3) | C2   | C3   | 1.383(4) |
| F7   | C9   | 1.338(4) | C3   | C5   | 1.496(4) |
| F8   | C9   | 1.339(4) | C6   | C7   | 1.388(4) |
| F9   | C9   | 1.328(4) | C6   | C9   | 1.497(4) |
| F10  | C10  | 1.342(3) | C7   | C8   | 1.391(4) |

**Table S4:** Bond Lengths for [H<sub>2</sub>B(3,5-(CF<sub>3</sub>)<sub>2</sub>Pz)<sub>2</sub>]Cu(HC≡CH) (**4**).

| Atom | Atom | Length/Å | Atom | Atom | Length/Å |
|------|------|----------|------|------|----------|
| F11  | C10  | 1.338(4) | C8   | C10  | 1.492(4) |
| F12  | C10  | 1.331(4) | C11  | C12  | 1.225(5) |
| N1   | N2   | 1.360(4) |      |      |          |

**Table S5:** Bond Angles for [H<sub>2</sub>B(3,5-(CF<sub>3</sub>)<sub>2</sub>Pz)<sub>2</sub>]Cu(HC≡CH) (**4**).

| Atom | Atom | Atom | Angle/°    | Atom | Atom | Atom | Angle/°  |
|------|------|------|------------|------|------|------|----------|
| N4   | Cu   | N2   | 96.63(10)  | F3   | C4   | C1   | 110.4(3) |
| C11  | Cu   | N2   | 114.01(13) | F4   | C5   | F5   | 106.7(3) |
| C11  | Cu   | N4   | 149.36(13) | F4   | C5   | F6   | 107.4(3) |
| C11  | Cu   | C12  | 36.17(14)  | F4   | C5   | C3   | 112.6(3) |
| C12  | Cu   | N2   | 150.15(13) | F5   | C5   | C3   | 112.1(3) |
| C12  | Cu   | N4   | 113.19(13) | F6   | C5   | F5   | 107.4(3) |
| N2   | N1   | B    | 118.8(2)   | F6   | C5   | C3   | 110.3(3) |
| C3   | N1   | N2   | 108.7(2)   | N4   | C6   | C7   | 111.7(3) |
| C3   | N1   | B    | 132.2(3)   | N4   | C6   | C9   | 120.1(3) |
| N1   | N2   | Cu   | 116.36(19) | C7   | C6   | C9   | 128.1(3) |
| C1   | N2   | Cu   | 136.2(2)   | C6   | C7   | C8   | 103.1(3) |
| C1   | N2   | N1   | 106.6(2)   | N3   | C8   | C7   | 109.6(3) |
| N4   | N3   | B    | 118.9(2)   | N3   | C8   | C10  | 122.7(3) |
| C8   | N3   | N4   | 108.8(2)   | C7   | C8   | C10  | 127.6(3) |
| C8   | N3   | B    | 132.1(3)   | F7   | C9   | F8   | 106.8(3) |
| N3   | N4   | Cu   | 117.10(18) | F7   | C9   | C6   | 110.8(3) |
| C6   | N4   | Cu   | 136.1(2)   | F8   | C9   | C6   | 112.3(3) |
| C6   | N4   | N3   | 106.7(2)   | F9   | C9   | F7   | 107.8(3) |
| N2   | C1   | C2   | 111.7(3)   | F9   | C9   | F8   | 106.4(3) |
| N2   | C1   | C4   | 120.4(3)   | F9   | C9   | C6   | 112.4(3) |
| C2   | C1   | C4   | 127.9(3)   | F10  | C10  | C8   | 109.6(3) |
| C3   | C2   | C1   | 103.3(3)   | F11  | C10  | F10  | 107.2(2) |
| N1   | C3   | C2   | 109.7(3)   | F11  | C10  | C8   | 111.6(3) |
| N1   | C3   | C5   | 123.6(3)   | F12  | C10  | F10  | 107.3(3) |
| C2   | C3   | C5   | 126.7(3)   | F12  | C10  | F11  | 107.5(3) |
| F1   | C4   | F2   | 106.3(3)   | F12  | C10  | C8   | 113.4(3) |
| F1   | C4   | F3   | 107.5(3)   | C12  | C11  | Cu   | 72.0(2)  |
| F1   | C4   | C1   | 113.0(3)   | C11  | C12  | Cu   | 71.9(2)  |

**Table S5:** Bond Angles for [H<sub>2</sub>B(3,5-(CF<sub>3</sub>)<sub>2</sub>Pz)<sub>2</sub>]Cu(HC≡CH) (**4**).

| Atom | Atom | Atom | Angle/°  | Atom | Atom | Atom | Angle/°  |
|------|------|------|----------|------|------|------|----------|
| F2   | C4   | C1   | 112.3(3) | N3   | B    | N1   | 107.6(2) |
| F3   | C4   | F2   | 107.0(3) |      |      |      |          |

**Crystal Data** for C<sub>12</sub>H<sub>6</sub>BCuF<sub>12</sub>N<sub>4</sub> (*M* = 508.56 g/mol): monoclinic, space group P2<sub>1</sub>/n (no. 14), *a* = 9.2406(5) Å, *b* = 9.3114(5) Å, *c* = 19.4623(10) Å, *β* = 90.690(2)°, *V* = 1674.47(15) Å<sup>3</sup>, *Z* = 4, *T* = 99.98 K, *μ*(Mo Kα) = 1.439 mm<sup>-1</sup>, *D*<sub>calc</sub> = 2.017 g/cm<sup>3</sup>, 22428 reflections measured (6.044° ≤ 2Θ ≤ 61.108°), 5110 unique (*R*<sub>int</sub> = 0.0358, *R*<sub>sigma</sub> = 0.0304) which were used in all calculations. The final *R*<sub>1</sub> was 0.0435 (*I* > 2σ(*I*)) and *wR*<sub>2</sub> was 0.1182 (all data).

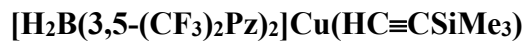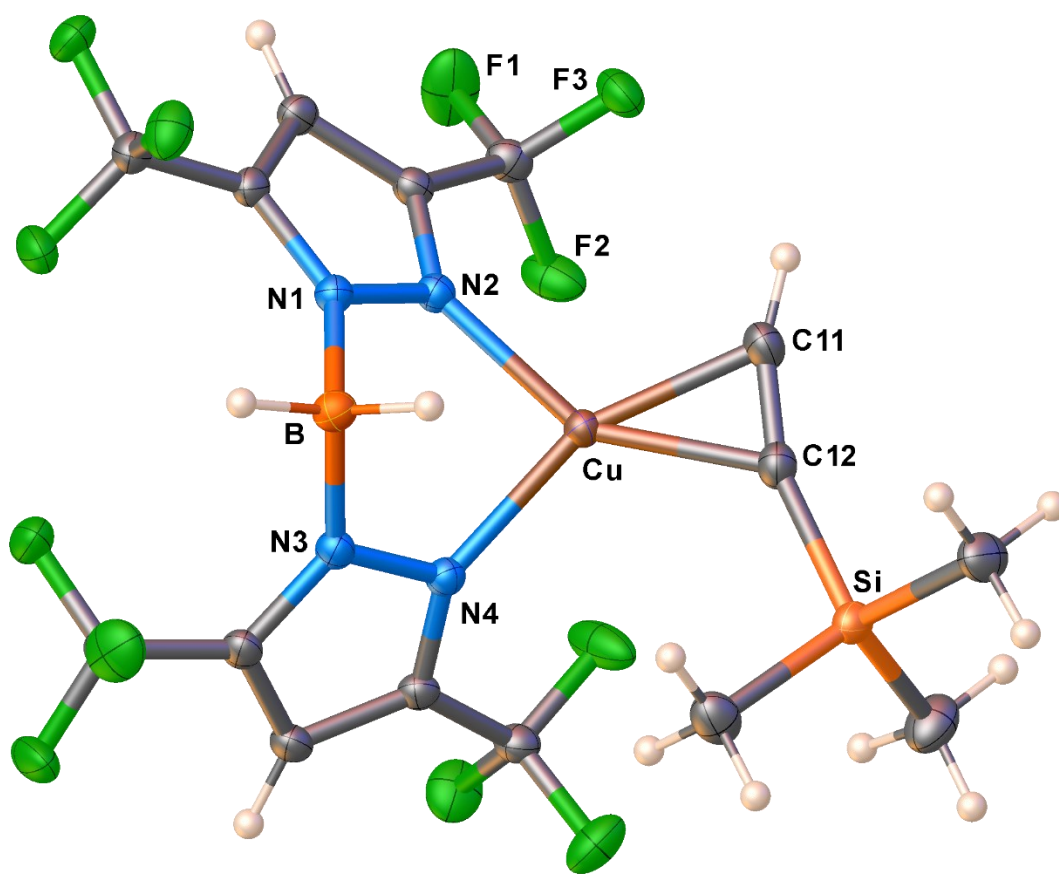

**Figure S23:** Molecular structure of  $[\text{H}_2\text{B}(3,5\text{-(CF}_3)_2\text{Pz)}_2]\text{Cu}(\text{HC}\equiv\text{CSiMe}_3)$  (**5**).

**Table S6:** Crystal data and structure refinement for  $[\text{H}_2\text{B}(3,5\text{-(CF}_3)_2\text{Pz)}_2]\text{Cu}(\text{HC}\equiv\text{CSiMe}_3)$  (**5**).

|                     |                                                                 |
|---------------------|-----------------------------------------------------------------|
| Identification code | rad773_0m_a                                                     |
| Empirical formula   | $\text{C}_{15}\text{H}_{14}\text{BCuF}_{12}\text{N}_4\text{Si}$ |
| Formula weight      | 580.74                                                          |
| Temperature/K       | 99.99                                                           |
| Crystal system      | monoclinic                                                      |
| Space group         | $\text{P2}_1/\text{c}$                                          |
| $a/\text{\AA}$      | 12.8899(4)                                                      |
| $b/\text{\AA}$      | 13.6339(4)                                                      |
| $c/\text{\AA}$      | 12.9411(4)                                                      |
| $\alpha/^\circ$     | 90                                                              |

|                                               |                                                                |
|-----------------------------------------------|----------------------------------------------------------------|
| $\beta/^\circ$                                | 97.8970(10)                                                    |
| $\gamma/^\circ$                               | 90                                                             |
| Volume/ $\text{\AA}^3$                        | 2252.70(12)                                                    |
| Z                                             | 4                                                              |
| $\rho_{\text{calc}}/\text{g/cm}^3$            | 1.712                                                          |
| $\mu/\text{mm}^{-1}$                          | 1.132                                                          |
| F(000)                                        | 1152.0                                                         |
| Crystal size/ $\text{mm}^3$                   | $0.33 \times 0.23 \times 0.2$                                  |
| Radiation                                     | Mo K $\alpha$ ( $\lambda = 0.71073$ )                          |
| $2\Theta$ range for data collection/ $^\circ$ | 5.656 to 75.966                                                |
| Index ranges                                  | $-22 \leq h \leq 21, -23 \leq k \leq 23, -21 \leq l \leq 22$   |
| Reflections collected                         | 45484                                                          |
| Independent reflections                       | 11851 [ $R_{\text{int}} = 0.0343, R_{\text{sigma}} = 0.0354$ ] |
| Data/restraints/parameters                    | 11851/0/323                                                    |
| Goodness-of-fit on $F^2$                      | 1.021                                                          |
| Final R indexes [ $I \geq 2\sigma(I)$ ]       | $R_1 = 0.0372, wR_2 = 0.0821$                                  |
| Final R indexes [all data]                    | $R_1 = 0.0576, wR_2 = 0.0902$                                  |
| Largest diff. peak/hole / $e \text{\AA}^{-3}$ | 0.58/-0.48                                                     |

**Table S7:** Bond Lengths for  $[\text{H}_2\text{B}(3,5\text{-(CF}_3)_2\text{Pz})_2]\text{Cu}(\text{HC}\equiv\text{CSiMe}_3)$  (**5**).

| Atom | Atom | Length/ $\text{\AA}$ | Atom | Atom | Length/ $\text{\AA}$ |
|------|------|----------------------|------|------|----------------------|
| Cu   | N2   | 1.9857(9)            | F12  | C10  | 1.3344(15)           |
| Cu   | N4   | 1.9845(9)            | N1   | N2   | 1.3513(13)           |
| Cu   | C11  | 1.9600(12)           | N1   | C3   | 1.3501(14)           |
| Cu   | C12  | 1.9957(11)           | N1   | B    | 1.5778(15)           |
| Si   | C12  | 1.8713(12)           | N2   | C1   | 1.3344(14)           |
| Si   | C13  | 1.8572(14)           | N3   | N4   | 1.3521(13)           |
| Si   | C14  | 1.8551(15)           | N3   | C8   | 1.3530(14)           |
| Si   | C15  | 1.8579(13)           | N3   | B    | 1.5737(16)           |
| F1   | C4   | 1.3311(14)           | N4   | C6   | 1.3355(14)           |
| F2   | C4   | 1.3382(15)           | C1   | C2   | 1.3914(16)           |
| F3   | C4   | 1.3359(14)           | C1   | C4   | 1.4875(16)           |
| F4   | C5   | 1.3363(14)           | C2   | C3   | 1.3842(16)           |
| F5   | C5   | 1.3392(14)           | C3   | C5   | 1.4928(16)           |
| F6   | C5   | 1.3327(13)           | C6   | C7   | 1.3923(16)           |
| F7   | C9   | 1.3388(14)           | C6   | C9   | 1.4893(16)           |
| F8   | C9   | 1.3272(14)           | C7   | C8   | 1.3799(17)           |
| F9   | C9   | 1.3344(14)           | C8   | C10  | 1.4945(16)           |

**Table S7:** Bond Lengths for [H<sub>2</sub>B(3,5-(CF<sub>3</sub>)<sub>2</sub>Pz)<sub>2</sub>]Cu(HC≡CSiMe<sub>3</sub>) (**5**).

| Atom | Atom | Length/Å   | Atom | Atom | Length/Å   |
|------|------|------------|------|------|------------|
| F10  | C10  | 1.3319(15) | C11  | C12  | 1.2343(17) |
| F11  | C10  | 1.3389(17) |      |      |            |

**Table S8:** Bond Angles for [H<sub>2</sub>B(3,5-(CF<sub>3</sub>)<sub>2</sub>Pz)<sub>2</sub>]Cu(HC≡CSiMe<sub>3</sub>) (**5**).

| Atom | Atom | Atom | Angle/°    | Atom | Atom | Atom | Angle/°    |
|------|------|------|------------|------|------|------|------------|
| N2   | Cu   | C12  | 148.36(4)  | F2   | C4   | C1   | 111.56(9)  |
| N4   | Cu   | N2   | 90.59(4)   | F3   | C4   | F2   | 106.16(10) |
| N4   | Cu   | C12  | 120.05(4)  | F3   | C4   | C1   | 112.60(10) |
| C11  | Cu   | N2   | 112.92(5)  | F4   | C5   | F5   | 107.31(10) |
| C11  | Cu   | N4   | 156.37(5)  | F4   | C5   | C3   | 109.78(10) |
| C11  | Cu   | C12  | 36.35(5)   | F5   | C5   | C3   | 111.82(9)  |
| C13  | Si   | C12  | 108.64(6)  | F6   | C5   | F4   | 107.33(9)  |
| C13  | Si   | C15  | 111.59(7)  | F6   | C5   | F5   | 107.17(10) |
| C14  | Si   | C12  | 107.92(7)  | F6   | C5   | C3   | 113.16(10) |
| C14  | Si   | C13  | 112.45(7)  | N4   | C6   | C7   | 111.06(10) |
| C14  | Si   | C15  | 111.59(7)  | N4   | C6   | C9   | 120.11(10) |
| C15  | Si   | C12  | 104.21(6)  | C7   | C6   | C9   | 128.76(10) |
| N2   | N1   | B    | 117.79(9)  | C8   | C7   | C6   | 103.61(10) |
| C3   | N1   | N2   | 108.71(9)  | N3   | C8   | C7   | 109.51(10) |
| C3   | N1   | B    | 133.49(9)  | N3   | C8   | C10  | 122.98(11) |
| N1   | N2   | Cu   | 115.16(7)  | C7   | C8   | C10  | 127.47(11) |
| C1   | N2   | Cu   | 137.31(8)  | F7   | C9   | C6   | 111.42(9)  |
| C1   | N2   | N1   | 107.11(9)  | F8   | C9   | F7   | 107.08(10) |
| N4   | N3   | C8   | 108.77(9)  | F8   | C9   | F9   | 106.89(10) |
| N4   | N3   | B    | 117.34(9)  | F8   | C9   | C6   | 111.70(10) |
| C8   | N3   | B    | 133.68(10) | F9   | C9   | F7   | 106.18(10) |
| N3   | N4   | Cu   | 115.68(7)  | F9   | C9   | C6   | 113.18(10) |
| C6   | N4   | Cu   | 135.95(8)  | F10  | C10  | F11  | 106.87(11) |
| C6   | N4   | N3   | 107.03(9)  | F10  | C10  | F12  | 107.64(11) |
| N2   | C1   | C2   | 111.18(10) | F10  | C10  | C8   | 112.37(10) |
| N2   | C1   | C4   | 119.19(10) | F11  | C10  | C8   | 112.38(11) |
| C2   | C1   | C4   | 129.62(10) | F12  | C10  | F11  | 107.41(10) |
| C3   | C2   | C1   | 103.34(9)  | F12  | C10  | C8   | 109.93(11) |
| N1   | C3   | C2   | 109.64(10) | C12  | C11  | Cu   | 73.40(8)   |

**Table S8:** Bond Angles for [H<sub>2</sub>B(3,5-(CF<sub>3</sub>)<sub>2</sub>Pz)<sub>2</sub>]Cu(HC≡CSiMe<sub>3</sub>) (**5**).

| Atom | Atom | Atom | Angle/°    | Atom | Atom | Atom | Angle/°    |
|------|------|------|------------|------|------|------|------------|
| N1   | C3   | C5   | 123.19(10) | Si   | C12  | Cu   | 128.26(6)  |
| C2   | C3   | C5   | 127.11(10) | C11  | C12  | Cu   | 70.25(8)   |
| F1   | C4   | F2   | 107.99(11) | C11  | C12  | Si   | 160.64(11) |
| F1   | C4   | F3   | 107.00(10) | N3   | B    | N1   | 106.41(9)  |
| F1   | C4   | C1   | 111.23(10) |      |      |      |            |

**Crystal Data** for C<sub>15</sub>H<sub>14</sub>BCuF<sub>12</sub>N<sub>4</sub>Si (*M* = 580.74 g/mol): monoclinic, space group P2<sub>1</sub>/c (no. 14), *a* = 12.8899(4) Å, *b* = 13.6339(4) Å, *c* = 12.9411(4) Å, *β* = 97.8970(10)°, *V* = 2252.70(12) Å<sup>3</sup>, *Z* = 4, *T* = 99.99 K, *μ*(Mo Kα) = 1.132 mm<sup>-1</sup>, *D*<sub>calc</sub> = 1.712 g/cm<sup>3</sup>, 45484 reflections measured (5.656° ≤ 2Θ ≤ 75.966°), 11851 unique (*R*<sub>int</sub> = 0.0343, *R*<sub>sigma</sub> = 0.0354) which were used in all calculations. The final *R*<sub>1</sub> was 0.0372 (*I* > 2σ(*I*)) and *wR*<sub>2</sub> was 0.0902 (all data).



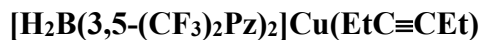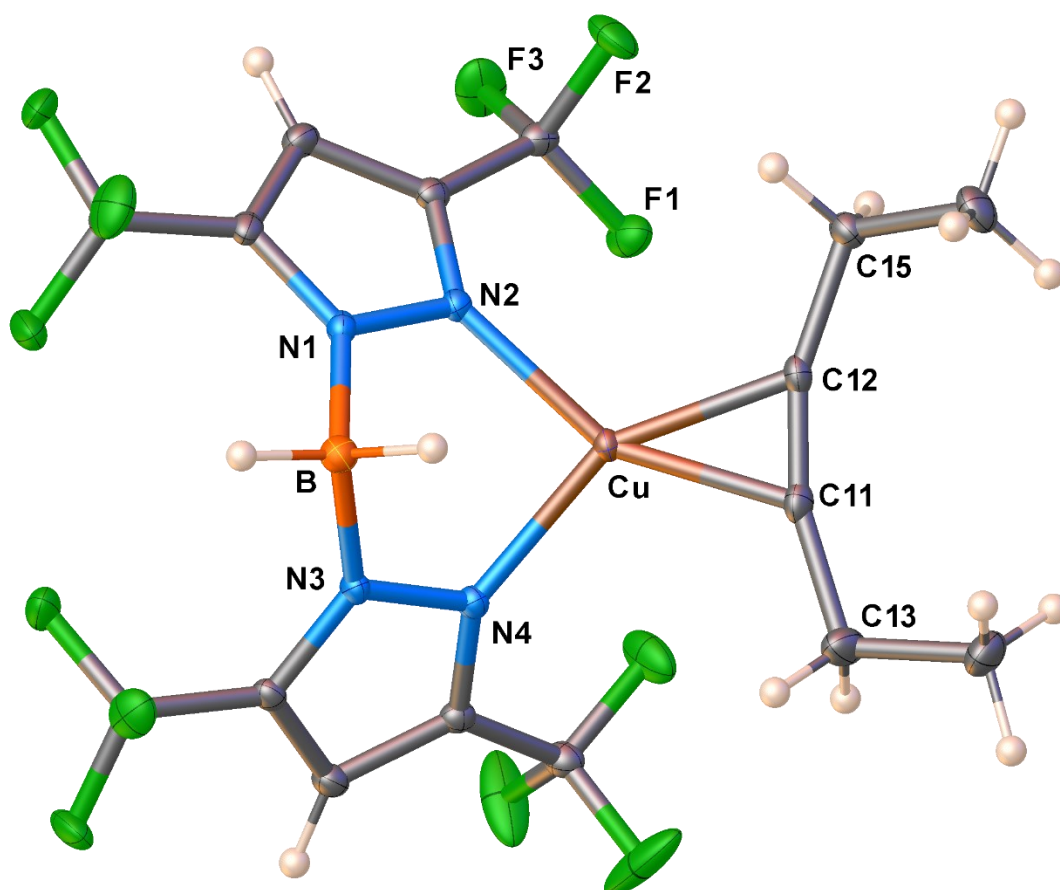

**Figure S24:** Molecular structure of  $[\text{H}_2\text{B}(3,5\text{-(CF}_3)_2\text{Pz)}_2]\text{Cu}(\text{EtC}\equiv\text{CEt})$  (**6**).

**Table S9:** Crystal data and structure refinement for  $[\text{H}_2\text{B}(3,5\text{-(CF}_3)_2\text{Pz)}_2]\text{Cu}(\text{EtC}\equiv\text{CEt})$  (**6**).

|                     |                                                        |
|---------------------|--------------------------------------------------------|
| Identification code | rad769_0m_a                                            |
| Empirical formula   | $\text{C}_{16}\text{H}_{14}\text{BCuF}_{12}\text{N}_4$ |
| Formula weight      | 564.66                                                 |
| Temperature/K       | 100.0                                                  |
| Crystal system      | triclinic                                              |
| Space group         | P-1                                                    |
| $a/\text{\AA}$      | 8.1718(4)                                              |
| $b/\text{\AA}$      | 11.6524(6)                                             |
| $c/\text{\AA}$      | 12.6430(7)                                             |
| $\alpha/^\circ$     | 63.9860(10)                                            |

|                                                |                                                                    |
|------------------------------------------------|--------------------------------------------------------------------|
| $\beta/^\circ$                                 | 78.525(2)                                                          |
| $\gamma/^\circ$                                | 80.5110(10)                                                        |
| Volume/ $\text{\AA}^3$                         | 1056.16(10)                                                        |
| Z                                              | 2                                                                  |
| $\rho_{\text{calc}}/\text{g/cm}^3$             | 1.776                                                              |
| $\mu/\text{mm}^{-1}$                           | 1.151                                                              |
| F(000)                                         | 560.0                                                              |
| Crystal size/ $\text{mm}^3$                    | $0.23 \times 0.2 \times 0.2$                                       |
| Radiation                                      | MoK $\alpha$ ( $\lambda = 0.71073$ )                               |
| 2 $\Theta$ range for data collection/ $^\circ$ | 5.812 to 61.398                                                    |
| Index ranges                                   | $-11 \leq h \leq 11$ , $-16 \leq k \leq 16$ , $-18 \leq l \leq 18$ |
| Reflections collected                          | 53722                                                              |
| Independent reflections                        | 6553 [ $R_{\text{int}} = 0.0468$ , $R_{\text{sigma}} = 0.0310$ ]   |
| Data/restraints/parameters                     | 6553/0/318                                                         |
| Goodness-of-fit on $F^2$                       | 1.018                                                              |
| Final R indexes [ $I \geq 2\sigma(I)$ ]        | $R_1 = 0.0365$ , $wR_2 = 0.0696$                                   |
| Final R indexes [all data]                     | $R_1 = 0.0494$ , $wR_2 = 0.0748$                                   |
| Largest diff. peak/hole / $e \text{ \AA}^{-3}$ | 0.70/-0.66                                                         |

**Table S10:** Bond Lengths for  $[\text{H}_2\text{B}(3,5\text{-(CF}_3)_2\text{Pz})_2]\text{Cu}(\text{EtC}\equiv\text{CEt})(\mathbf{6})$ .

| Atom | Atom | Length/ $\text{\AA}$ | Atom | Atom | Length/ $\text{\AA}$ |
|------|------|----------------------|------|------|----------------------|
| Cu   | N2   | 1.9992(14)           | N2   | C1   | 1.336(2)             |
| Cu   | N4   | 2.0022(14)           | N3   | N4   | 1.3553(19)           |
| Cu   | C11  | 1.9818(16)           | N3   | C8   | 1.354(2)             |
| Cu   | C12  | 1.9862(16)           | N3   | B    | 1.572(2)             |
| F1   | C4   | 1.338(2)             | N4   | C6   | 1.337(2)             |
| F2   | C4   | 1.3385(19)           | C1   | C2   | 1.391(2)             |
| F3   | C4   | 1.336(2)             | C1   | C4   | 1.488(2)             |
| F4   | C5   | 1.338(2)             | C2   | C3   | 1.378(2)             |
| F5   | C5   | 1.339(2)             | C3   | C5   | 1.495(2)             |
| F6   | C5   | 1.334(2)             | C6   | C7   | 1.393(2)             |
| F7   | C9   | 1.317(2)             | C6   | C9   | 1.486(2)             |
| F8   | C9   | 1.331(2)             | C7   | C8   | 1.376(2)             |
| F9   | C9   | 1.325(2)             | C8   | C10  | 1.494(2)             |
| F10  | C10  | 1.333(2)             | C11  | C12  | 1.235(2)             |
| F11  | C10  | 1.331(2)             | C11  | C13  | 1.480(3)             |

**Table S10:** Bond Lengths for [H<sub>2</sub>B(3,5-(CF<sub>3</sub>)<sub>2</sub>Pz)<sub>2</sub>]Cu(EtC≡CEt)(**6**).

| Atom | Atom | Length/Å   | Atom | Atom | Length/Å |
|------|------|------------|------|------|----------|
| F12  | C10  | 1.340(2)   | C12  | C15  | 1.479(2) |
| N1   | N2   | 1.3556(19) | C13  | C14  | 1.519(3) |
| N1   | C3   | 1.355(2)   | C15  | C16  | 1.530(2) |
| N1   | B    | 1.574(2)   |      |      |          |

**Table S11:** Bond Angles for [H<sub>2</sub>B(3,5-(CF<sub>3</sub>)<sub>2</sub>Pz)<sub>2</sub>]Cu(EtC≡CEt)(**6**).

| Atom | Atom | Atom | Angle/°    | Atom | Atom | Atom | Angle/°    |
|------|------|------|------------|------|------|------|------------|
| N2   | Cu   | N4   | 91.94(6)   | F5   | C5   | C3   | 109.60(15) |
| C11  | Cu   | N2   | 153.49(6)  | F6   | C5   | F4   | 107.36(15) |
| C11  | Cu   | N4   | 114.02(7)  | F6   | C5   | F5   | 107.02(14) |
| C11  | Cu   | C12  | 36.26(7)   | F6   | C5   | C3   | 112.67(15) |
| C12  | Cu   | N2   | 117.63(6)  | N4   | C6   | C7   | 111.25(15) |
| C12  | Cu   | N4   | 150.28(7)  | N4   | C6   | C9   | 121.45(15) |
| N2   | N1   | B    | 118.63(13) | C7   | C6   | C9   | 127.20(15) |
| C3   | N1   | N2   | 108.64(14) | C8   | C7   | C6   | 103.56(14) |
| C3   | N1   | B    | 132.73(14) | N3   | C8   | C7   | 109.69(14) |
| N1   | N2   | Cu   | 114.97(10) | N3   | C8   | C10  | 123.16(15) |
| C1   | N2   | Cu   | 138.00(12) | C7   | C8   | C10  | 127.13(15) |
| C1   | N2   | N1   | 106.92(13) | F7   | C9   | F8   | 105.94(16) |
| N4   | N3   | B    | 117.90(13) | F7   | C9   | F9   | 108.08(17) |
| C8   | N3   | N4   | 108.79(13) | F7   | C9   | C6   | 113.30(15) |
| C8   | N3   | B    | 133.16(14) | F8   | C9   | C6   | 112.76(14) |
| N3   | N4   | Cu   | 115.60(10) | F9   | C9   | F8   | 105.75(15) |
| C6   | N4   | Cu   | 137.17(12) | F9   | C9   | C6   | 110.58(15) |
| C6   | N4   | N3   | 106.71(13) | F10  | C10  | F12  | 107.32(14) |
| N2   | C1   | C2   | 111.18(15) | F10  | C10  | C8   | 112.52(14) |
| N2   | C1   | C4   | 121.24(15) | F11  | C10  | F10  | 107.40(15) |
| C2   | C1   | C4   | 127.55(16) | F11  | C10  | F12  | 107.32(14) |
| C3   | C2   | C1   | 103.69(15) | F11  | C10  | C8   | 112.48(14) |
| N1   | C3   | C2   | 109.56(15) | F12  | C10  | C8   | 109.54(15) |
| N1   | C3   | C5   | 123.58(16) | C12  | C11  | Cu   | 72.06(11)  |
| C2   | C3   | C5   | 126.86(16) | C12  | C11  | C13  | 162.90(17) |
| F1   | C4   | F2   | 106.64(14) | C13  | C11  | Cu   | 125.00(12) |
| F1   | C4   | C1   | 112.64(14) | C11  | C12  | Cu   | 71.68(10)  |

**Table S11:** Bond Angles for [H<sub>2</sub>B(3,5-(CF<sub>3</sub>)<sub>2</sub>Pz)<sub>2</sub>]Cu(EtC≡CEt)(**6**).

| Atom | Atom | Atom | Angle/°    | Atom | Atom | Atom | Angle/°    |
|------|------|------|------------|------|------|------|------------|
| F2   | C4   | C1   | 112.12(14) | C11  | C12  | C15  | 160.33(17) |
| F3   | C4   | F1   | 107.19(14) | C15  | C12  | Cu   | 127.98(12) |
| F3   | C4   | F2   | 106.86(14) | C11  | C13  | C14  | 112.22(16) |
| F3   | C4   | C1   | 111.04(14) | C12  | C15  | C16  | 111.67(15) |
| F4   | C5   | F5   | 107.17(15) | N3   | B    | N1   | 106.45(13) |
| F4   | C5   | C3   | 112.71(15) |      |      |      |            |

**Crystal Data** for C<sub>16</sub>H<sub>14</sub>BCuF<sub>12</sub>N<sub>4</sub> ( $M=564.66$  g/mol): triclinic, space group P-1 (no. 2),  $a = 8.1718(4)$  Å,  $b = 11.6524(6)$  Å,  $c = 12.6430(7)$  Å,  $\alpha = 63.9860(10)^\circ$ ,  $\beta = 78.525(2)^\circ$ ,  $\gamma = 80.5110(10)^\circ$ ,  $V = 1056.16(10)$  Å<sup>3</sup>,  $Z = 2$ ,  $T = 100.0$  K,  $\mu(\text{MoK}\alpha) = 1.151$  mm<sup>-1</sup>,  $D_{\text{calc}} = 1.776$  g/cm<sup>3</sup>, 53722 reflections measured ( $5.812^\circ \leq 2\Theta \leq 61.398^\circ$ ), 6553 unique ( $R_{\text{int}} = 0.0468$ ,  $R_{\text{sigma}} = 0.0310$ ) which were used in all calculations. The final  $R_1$  was 0.0365 ( $I > 2\sigma(I)$ ) and  $wR_2$  was 0.0748 (all data).

## Raman Spectra of Free Alkynes

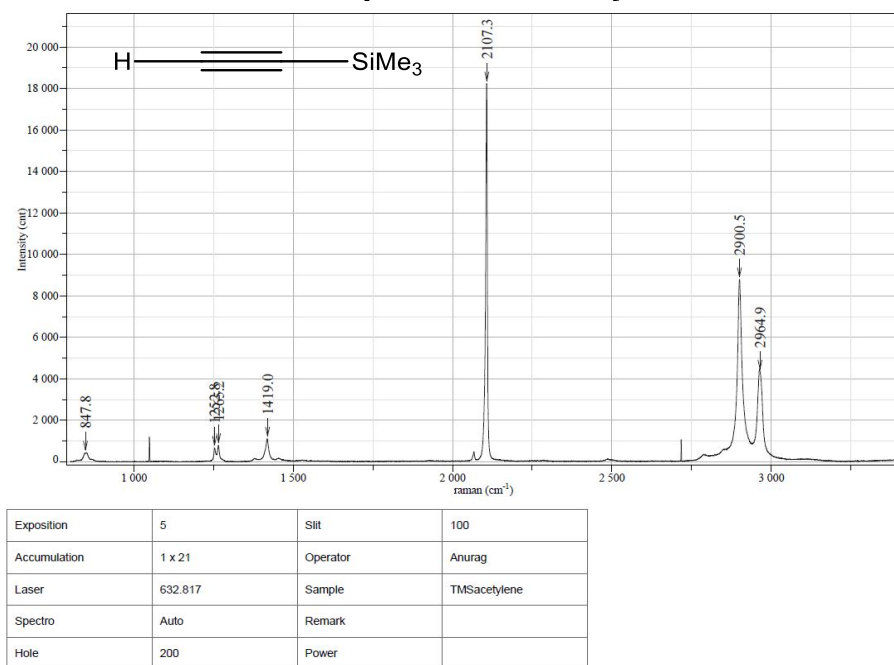

**Figure S25:** Raman spectrum of Trimethylsilylacetylene.

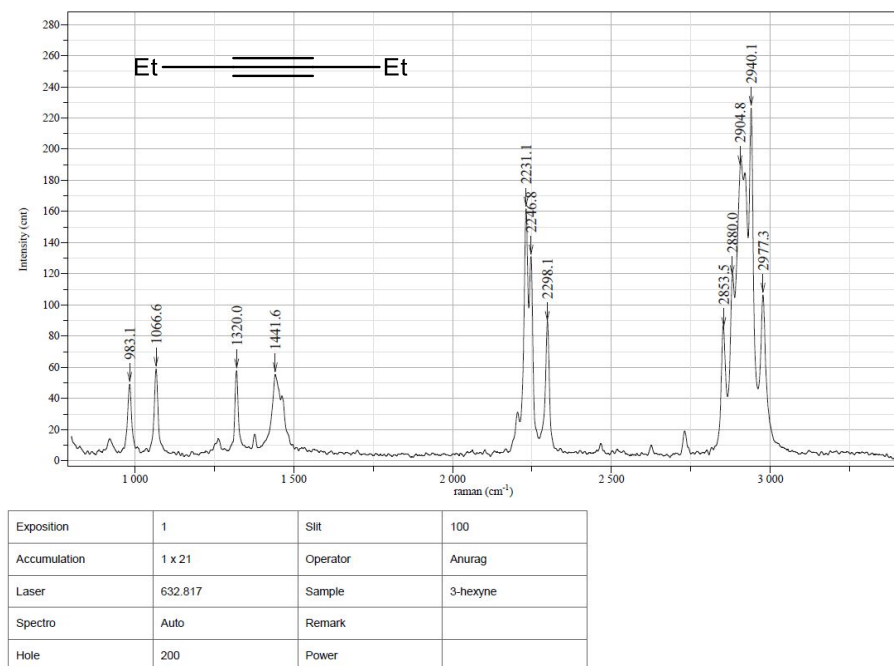

**Figure S26:** Raman spectrum of 3-hexyne.

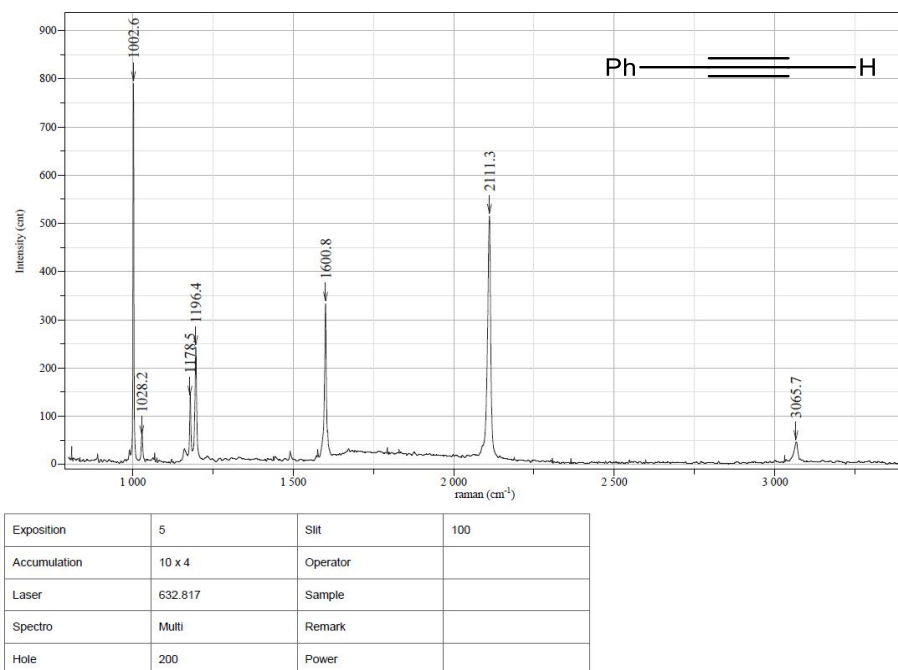

**Figure S27:** Raman spectrum of Phenylacetylene.

## Computational Details

Geometry optimizations and subsequent calculations were done using the ADF2019 code.[12,13] Triple- $\xi$  and two polarization functions (STO-TZ2P) basis sets were employed within the generalized gradient approximation (GGA) according to the BP86 exchange-correlation functional and the empirical dispersion correction to DFT (DFT-D) given by the pair-wise Grimme correction (D3)[14-17] and Becke-Johnson damping functions.[18,19] Energy convergence criterion was set to  $10^{-5}$  Hartree, gradient convergence criteria to  $10^{-4}$  Hartree/Å, and radial convergence criteria to  $10^{-3}$  Å, to achieve final relaxed structures. The energy decomposition analysis (EDA)[20-22] describes  $\Delta E_{\text{int}}$  in terms of different meaningful quantities accounting for the electrostatic interaction ( $\Delta E_{\text{elstat}}$ ) between the defined fragments, the repulsive exchange ( $\Delta E_{\text{Pauli}}$ ) interaction owing to the four-electron/two-orbital repulsion between occupied orbitals from the different fragments. The orbital (covalent) interaction ( $\Delta E_{\text{orb}}$ ), which comes from the orbital relaxation and the orbital mixing between the fragments. Moreover, the dispersion interaction ( $\Delta E_{\text{disp}}$ ) was evaluated via the pairwise correction of Grimme[6](DFT-D3), denoting a stabilizing character. The counterpoise method was employed to overcome basis set superposition error (BSSE), denoting values lower than  $2.0 \text{ kcal mol}^{-1}$ . According to:

$$\Delta E_{\text{int}} = \Delta E_{\text{Pauli}} + \Delta E_{\text{elstat}} + \Delta E_{\text{orb}} + \Delta E_{\text{disp}}$$

**Table S12.** Energy decomposition analysis of the interaction energy for  $(\text{Ph}_3\text{P})_2\text{Ni}(\text{HC}\equiv\text{CH})$  species accounting for the acetylene coordination. Values in  $\text{kcal.mol}^{-1}$ . Vibrational frequencies in  $\text{cm}^{-1}$ . Experimental value from [23].

|                                |        |       |
|--------------------------------|--------|-------|
| $\Delta E_{\text{Pauli}}$      | 172.1  |       |
| $\Delta E_{\text{Estat}}$      | -132.1 | 53.2% |
| $\Delta E_{\text{orb}}$        | -107.8 | 43.4% |
| $\Delta E_{\text{Disp}}$       | -8.3   | 3.4%  |
|                                |        |       |
| $\Delta E_{\text{int}}$        | -75.9  |       |
|                                |        |       |
| $\pi \rightarrow \text{Ni}$    | -77.6  | 72.0% |
| $\sigma \leftarrow \text{Ni}$  | -15.3  | 14.2% |
| $\nu_{\text{C}\equiv\text{C}}$ |        |       |
| Calc.                          | 1641   |       |
| Exp.                           | 1630   |       |

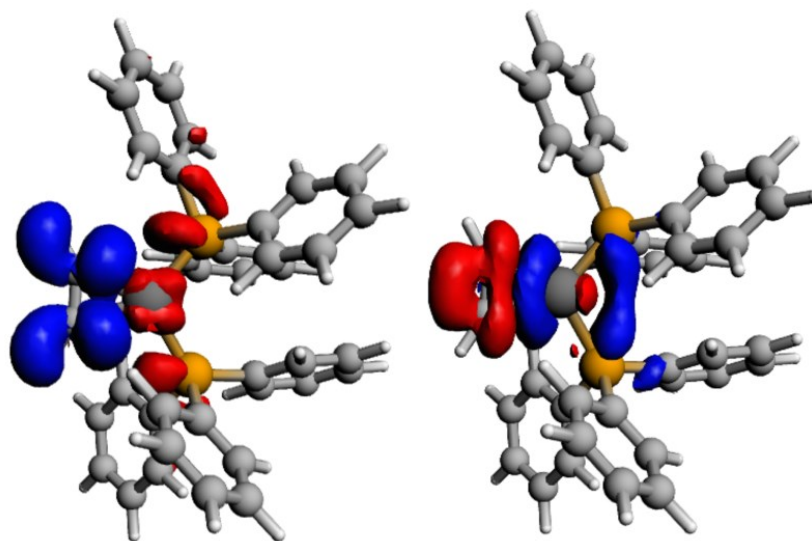

**Figure S28.** Deformation densities account for the  $\pi$ -backbonding (left) and  $\sigma$ -donation (right) contribution to the bonding scheme in the formation of  $(\text{Ph}_3\text{P})_2\text{Ni}(\text{HC}\equiv\text{CH})$ . Charge flow from red to blue.



## References

1. Parasar, D.; Ponduru, T.T.; Noonikara-Poyil, A.; Jayaratna, N.B.; Dias, H.V.R. Acetylene and terminal alkyne complexes of copper(i) supported by fluorinated pyrazolates: syntheses, structures, and transformations. *Dalton Transactions* **2019**, 48, 15782-15794, doi:10.1039/C9DT03350E.
2. Noonikara-Poyil, A.; Ridlen, S.G.; Dias, H.V.R. Isolable Copper(I)  $\eta^2$ -Cyclopropene Complexes. *Inorganic Chemistry* **2020**, 59, 17860-17865, doi:10.1021/acs.inorgchem.0c02886.
3. Parasar, D.; Almotawa, R.M.; Jayaratna, N.B.; Ceylan, Y.S.; Cundari, T.R.; Omary, M.A.; Dias, H.V.R. Synthesis, Photophysical Properties, and Computational Analysis of Di- and Tetranuclear Alkyne Complexes of Copper(I) Supported by a Highly Fluorinated Pyrazolate. *Organometallics* **2018**, 37, 4105-4118, doi:10.1021/acs.organomet.8b00657.
4. Dias, H.V.R.; Richey, S.A.; Diyabalanage, H.V.K.; Thankamani, J. Copper(I) complexes supported by a heavily fluorinated bis(pyrazolyl)borate: syntheses and characterization of  $[H_2B(3,5-(CF_3)_2Pz)_2]CuL$  (where  $L = PPh_3, NCCH_3, HCCPh, H_2CCHPh$ ) and  $\{[H_2B(3,5-(CF_3)_2Pz)_2]Cu\}_2(1,5-COD)$ . *Journal of Organometallic Chemistry* **2005**, 690, 1913-1922, doi:10.1016/j.jorgchem.2004.10.047.
5. Bhagavantam, S. Raman Spectra of Gases. *Nature* **1931**, 127, 817-818, doi:10.1038/127817b0.
6. Thompson, J.S.; Whitney, J.F. Preparation and structural characterization of acetylene(2,2'-dipyridylamine)copper(I) tetrafluoroborate. *Journal of the American Chemical Society* **2002**, 124, 5488-5490, doi:10.1021/ja00354a056.
7. Thompson, J.S.; Whitney, J.F. Copper(I) complexes with unsaturated small molecules. Preparation and structural characterization of copper(I)-di-2-pyridylamine complexes with olefins, acetylene, and carbon monoxide. *Inorganic Chemistry* **2002**, 41, 2813-2819, doi:10.1021/ic00186a020.
8. Munakata, M.; Kitagawa, S.; Kawada, I.; Maekawa, M.; Shimono, H. Synthesis, formation constants and structures of ternary copper(I) complexes with 1,10-phenanthroline and alkynes. *Journal of the Chemical Society, Dalton Transactions* **1992**, 10.1039/dt9920002225, 2225, doi:10.1039/dt9920002225.
9. Chesnokov, G.A.; Topchiy, M.A.; Dzhevakov, P.B.; Gribov, P.S.; Tukov, A.A.; Khrustalev, V.N.; Asachenko, A.F.; Nechaev, M.S. Eight-membered-ring diaminocarbenes bearing naphthalene moiety in the backbone: DFT studies, synthesis of amidinium salts, generation of free carbene, metal complexes, and solvent-free copper catalyzed azide-alkyne cycloaddition (CuAAC) reaction. *Dalton Transactions* **2017**, 46, 4331-4345, doi:10.1039/c6dt04484k.
10. Fletcher, J.T.; Sobczyk, J.M.; Gwazdacz, S.C.; Blanck, A.J. Antimicrobial 1,3,4-trisubstituted-1,2,3-triazolium salts. *Bioorganic & Medicinal Chemistry Letters* **2018**, 28, 3320-3323, doi:10.1016/j.bmcl.2018.09.011.
11. Kloss, F.; Köhn, U.; Jahn, B.O.; Hager, M.D.; Görls, H.; Schubert, U.S. Metal-Free 1,5-Regioselective Azide-Alkyne [3+2]-Cycloaddition. *Chemistry - An Asian Journal* **2011**, 6, 2816-2824, doi:10.1002/asia.201100404.
12. te Velde, G.; Baerends, E.J. Precise density-functional method for periodic structures. *Physical Review B* **1991**, 44, 7888-7903, doi:10.1103/PhysRevB.44.7888.

13. Fonseca Guerra, C.; Snijders, J.G.; te Velde, G.; Baerends, E.J. Towards an order- N DFT method. *Theoretical Chemistry Accounts: Theory, Computation, and Modeling (Theoretica Chimica Acta)* **1998**, 99, 391-403, doi:10.1007/s002140050353.
14. Grimme, S. Accurate description of van der Waals complexes by density functional theory including empirical corrections. *Journal of Computational Chemistry* **2004**, 25, 1463-1473, doi:10.1002/jcc.20078.
15. Grimme, S. Semiempirical GGA-type density functional constructed with a long-range dispersion correction. *Journal of Computational Chemistry* **2006**, 27, 1787-1799, doi:10.1002/jcc.20495.
16. Grimme, S.; Antony, J.; Ehrlich, S.; Krieg, H. A consistent and accurate ab initio parametrization of density functional dispersion correction (DFT-D) for the 94 elements H-Pu. *The Journal of Chemical Physics* **2010**, 132, 154104, doi:10.1063/1.3382344.
17. Grimme, S. Density functional theory with London dispersion corrections. *WIREs Computational Molecular Science* **2011**, 1, 211-228, doi:10.1002/wcms.30.
18. Johnson, E.R.; Becke, A.D. A post-Hartree–Fock model of intermolecular interactions. *The Journal of Chemical Physics* **2005**, 123, 024101, doi:10.1063/1.1949201.
19. Grimme, S.; Ehrlich, S.; Goerigk, L. Effect of the damping function in dispersion corrected density functional theory. *Journal of Computational Chemistry* **2011**, 32, 1456-1465, doi:10.1002/jcc.21759.
20. Versluis, L.; Ziegler, T. The determination of molecular structures by density functional theory. The evaluation of analytical energy gradients by numerical integration. *The Journal of Chemical Physics* **1988**, 88, 322-328, doi:10.1063/1.454603.
21. Ziegler, T.; Rauk, A. On the calculation of bonding energies by the Hartree Fock Slater method. *Theoretica Chimica Acta* **1977**, 46, 1-10, doi:10.1007/bf00551648.
22. Hopffgarten, M.v.; Frenking, G. Energy decomposition analysis. *WIREs Computational Molecular Science* **2011**, 2, 43-62, doi:10.1002/wcms.71.
23. Pörschke, K.R.; Tsay, Y.-H.; Krüger, C. Ethynebis(triphenylphosphane)nickel(0). *Angewandte Chemie International Edition in English* **1985**, 24, 323-324, doi:10.1002/anie.198503231.
